# Supplementary material for: Effects of pH and light exposure on the survival of bacteria and their ability to biodegrade organic compounds in clouds: Implications for microbial activity in acidic cloud water
Source: Copernicus journal article supplement (doi:10.5194/acp-2022-608), 2022-09-05
Supplement: Supplementary file 1 [file acp-2022-608-supplement.pdf]

1 **Supplementary Information**

2 **Effects of pH and light exposure on the survival of bacteria and their ability to biodegrade**  
3 **organic compounds in clouds: Implications for microbial activity in acidic cloud water**

4 Yushuo Liu,<sup>1,2</sup> Chee Kent Lim,<sup>1</sup> Zhiyong Shen,<sup>1</sup> Patrick K. H. Lee,<sup>1,3</sup> Theodora Nah<sup>1,2,3\*</sup>

5 *<sup>1</sup>School of Energy and Environment, City University of Hong Kong, Hong Kong SAR, China*

6 *<sup>2</sup>Shenzhen Research Institute, Nanshan District, Shenzhen, China*

7 *<sup>3</sup>State Key Laboratory of Marine Pollution, City University of Hong Kong, Hong Kong SAR, China*

8

9 *\* To whom correspondence should be addressed: Theodora Nah (Email: [theodora.nah@cityu.edu.hk](mailto:theodora.nah@cityu.edu.hk), Tel: +852*  
10 *3442 5578)*

11

12

13

14

15

16

17

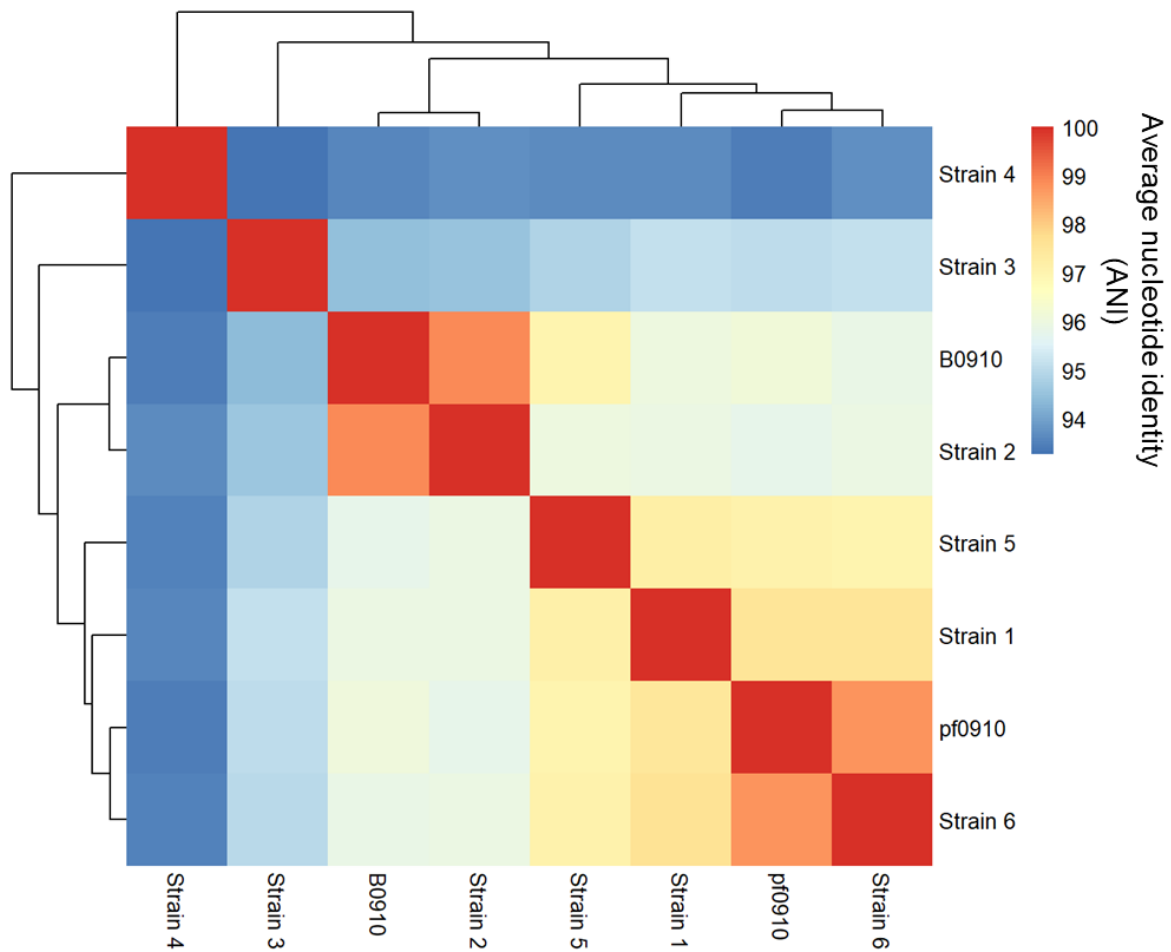

18

19 **Figure S1.** Average nucleotide identity (ANI) value of *Enterobacter* strains B0910, pf0910,  
 20 and six others. **Strain 1:** *Enterobacter hormaechei* subsp. *oharae* DSM 16687; **Strain 2:**  
 21 *Enterobacter hormaechei* subsp. *hoffmannii* DSM 14563; **Strain 3:** *Enterobacter hormaechei*  
 22 ATCC 49162; **Strain 4:** *Enterobacter quasihormaechei*. GCF 004331385.1; **Strain 5:**  
 23 *Enterobacter xiangfangensis* LMG27195; **Strain 6:** *Enterobacter hormaechei* subsp.  
 24 *steigerwaltii* DSM 16691. Strains 1 to 6 are the closest identified neighbors with strains B0910  
 25 and pf0910.

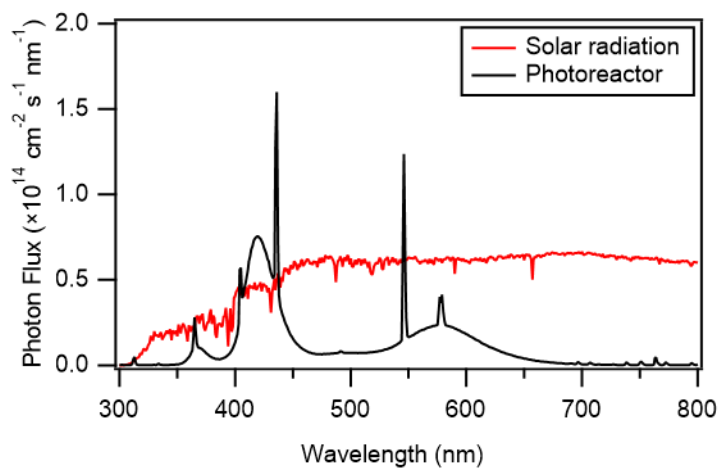

26

27 **Figure S2.** Photon flux inside of the photoreactor (black) and actinic flux for a fall day in Hong  
28 Kong in the morning (red). One lamp with output centered at  $\sim 365$  nm (RPR-3500A, Southern  
29 New England Ultraviolet Company), four lamps with outputs centered at  $\sim 421$  nm (RPR-  
30 4190A, Southern New England Ultraviolet Company), and three lamps with outputs centered  
31 at  $\sim 580$  nm (RPR-5750A, Southern New England Ultraviolet Company) were used to  
32 illuminate solutions in the photoreactor.

33

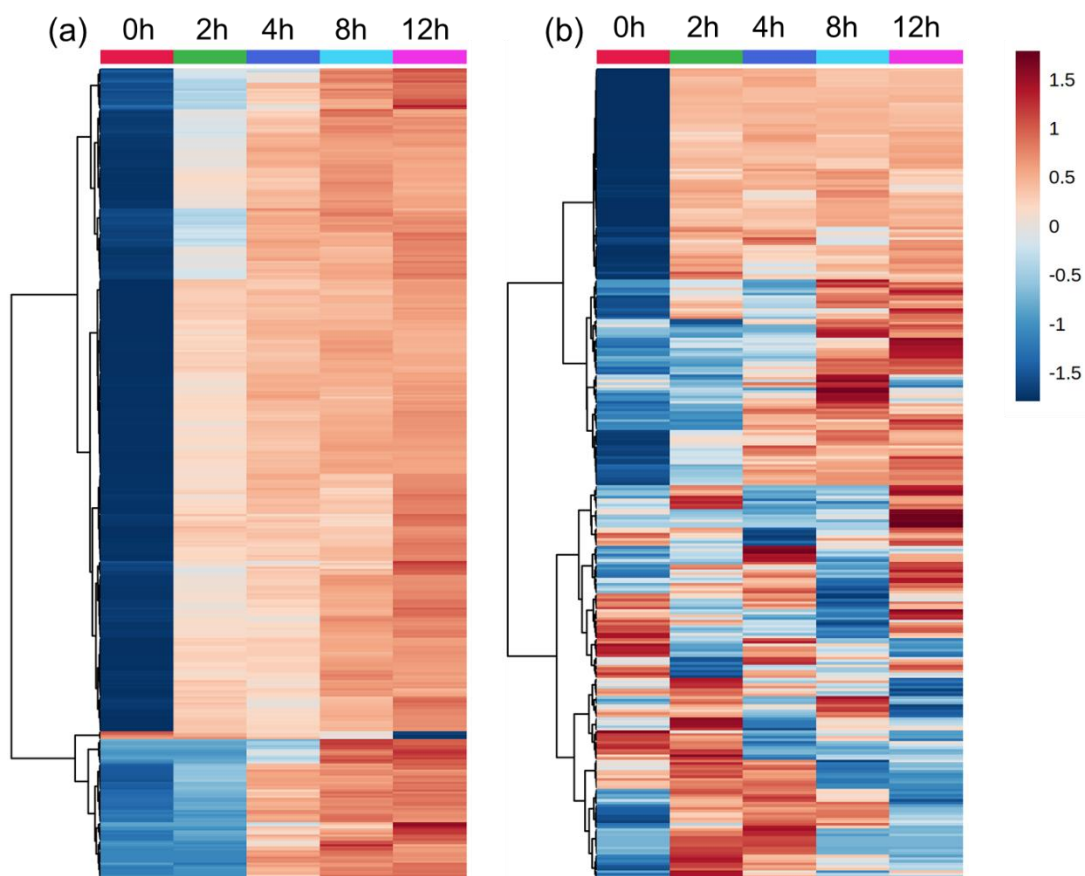

34

35 **Figure S3.** Heat maps showing the time evolution of (a) water-soluble compounds and (b)  
 36 water-insoluble compounds from *E. hormaechei* B0910 during exposure to simulated sunlight  
 37 at pH 4.3. The heat maps were generated from non-targeted UPLC-MS analysis of samples  
 38 with different light exposure times. 259 water-soluble compounds and 215 water-insoluble  
 39 compounds were selected based on PLS-DA results (VIP > 1.0 criteria). The average UPLC-  
 40 MS intensity of each compound at each light exposure time was obtained from the nine  
 41 replicates. The average UPLC-MS intensities were subsequently log<sub>10</sub> transformed and auto  
 42 scaled (i.e., mean-centered and divided by the standard deviation of each variable). The color  
 43 scale ranges from red color for high abundance to blue for low abundance.

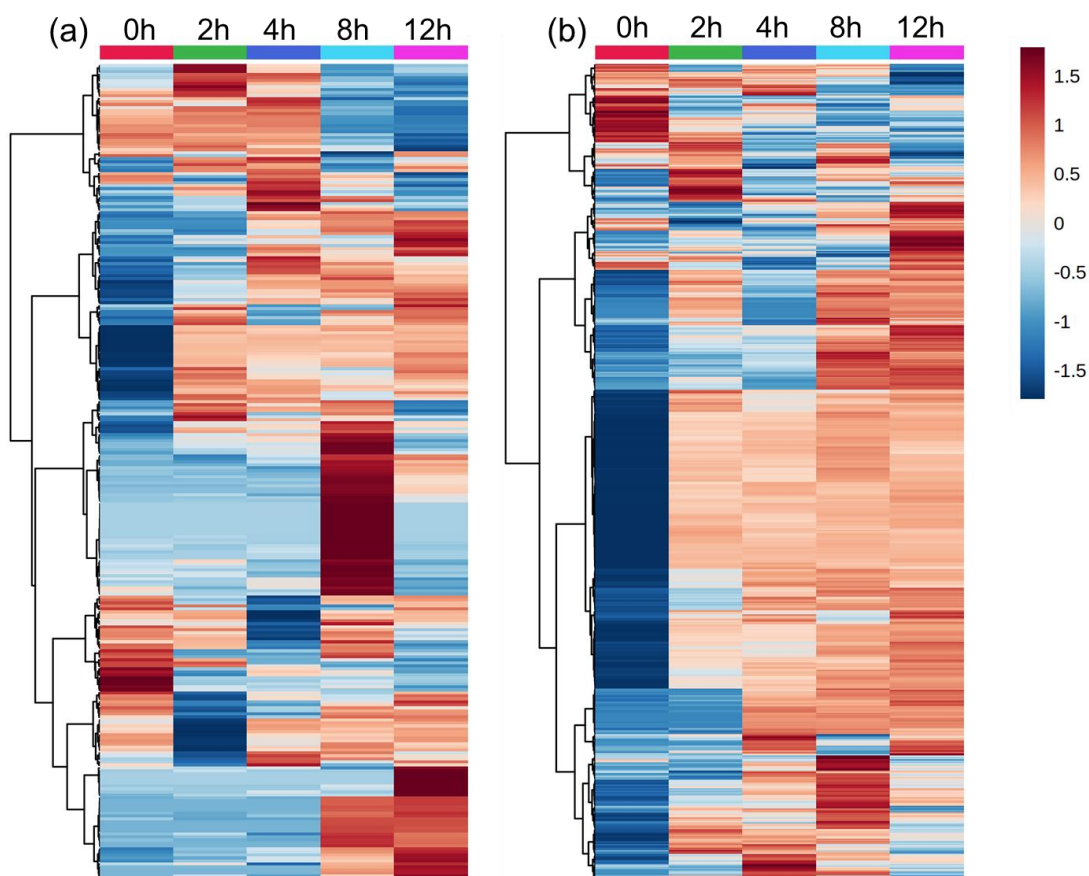

44

45 **Figure S4.** Heat maps showing the time evolution of (a) water-soluble compounds and (b)  
 46 water-insoluble compounds from *E. hormaechei* pf0910 during exposure to simulated sunlight  
 47 at pH 4.3. The heat maps were generated from non-targeted UPLC-MS analysis of samples  
 48 with different light exposure times. 209 water-soluble compounds and 251 water-insoluble  
 49 compounds were selected based on PLS-DA results (VIP > 1.0 criteria). The average UPLC-  
 50 MS intensity of each compound at each light exposure time was obtained from the nine  
 51 replicates. The average UPLC-MS intensities were subsequently log<sub>10</sub> transformed and auto  
 52 scaled (i.e., mean-centered and divided by the standard deviation of each variable). The color  
 53 scale ranges from red color for high abundance to blue for low abundance.

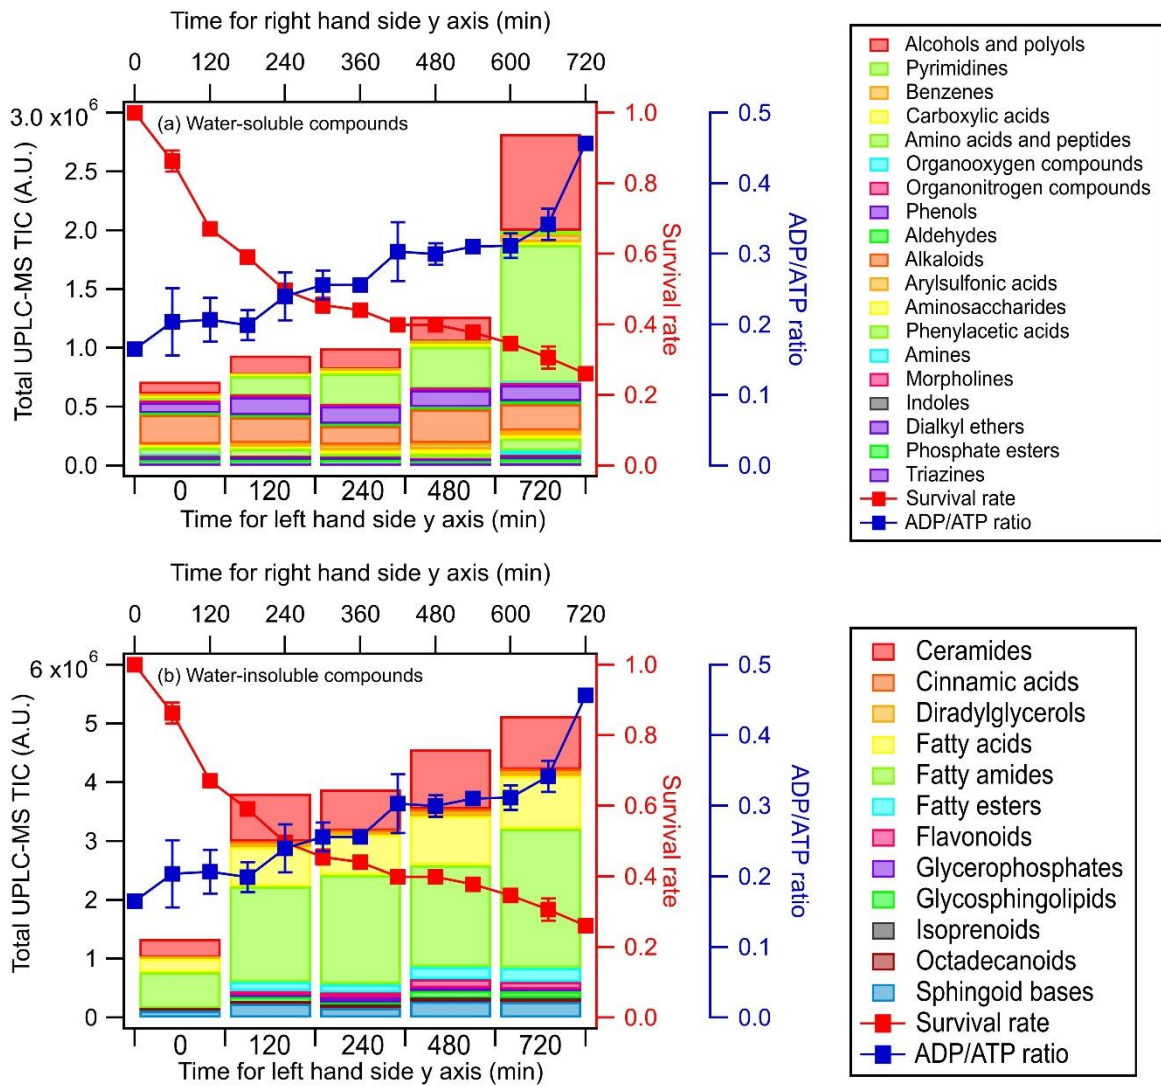

54  
 55 **Figure S5.** Time evolution of the UPLC-MS total ion chromatograph (TIC) signals of (a)  
 56 water-soluble compounds, and (b) water-insoluble compounds from *E. hormaechei* pf0910  
 57 during exposure to simulated sunlight at pH 4.3 over time. These compounds are classified  
 58 based on their chemical functionality. Also shown are the time evolution of the survival rate  
 59 and ADP/ATP ratio of *E. hormaechei* pf0910.

(a) Water-soluble compounds

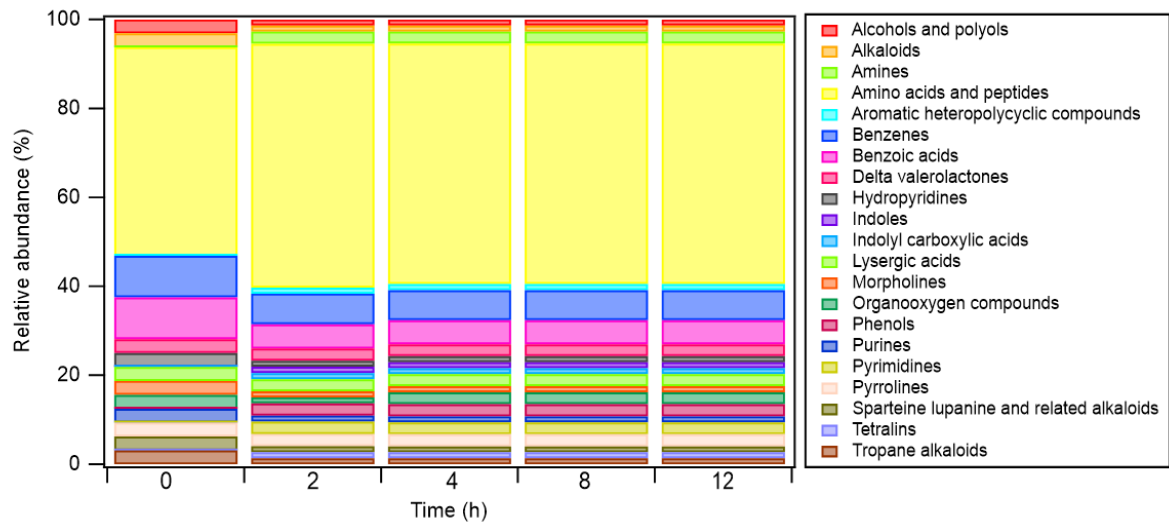

(b) Water-insoluble compounds

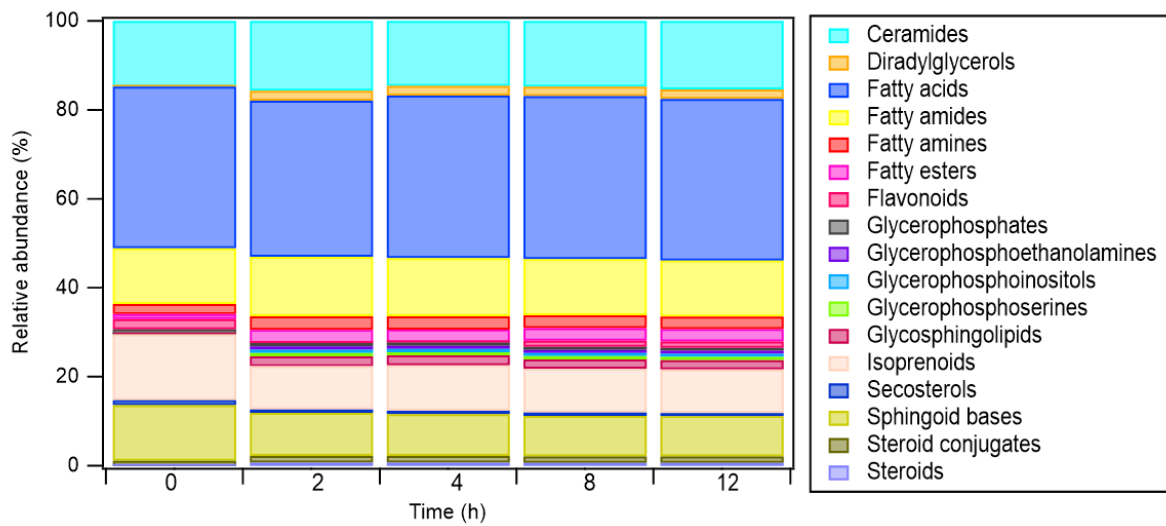

60

61 **Figure S6.** Relative abundance of the different classes of (a) water-soluble compounds, and (b)

62 water-insoluble compounds from *E. hormaechei* B0910 during exposure to simulated sunlight

63 at pH 4.3.

(a) Water-soluble compounds

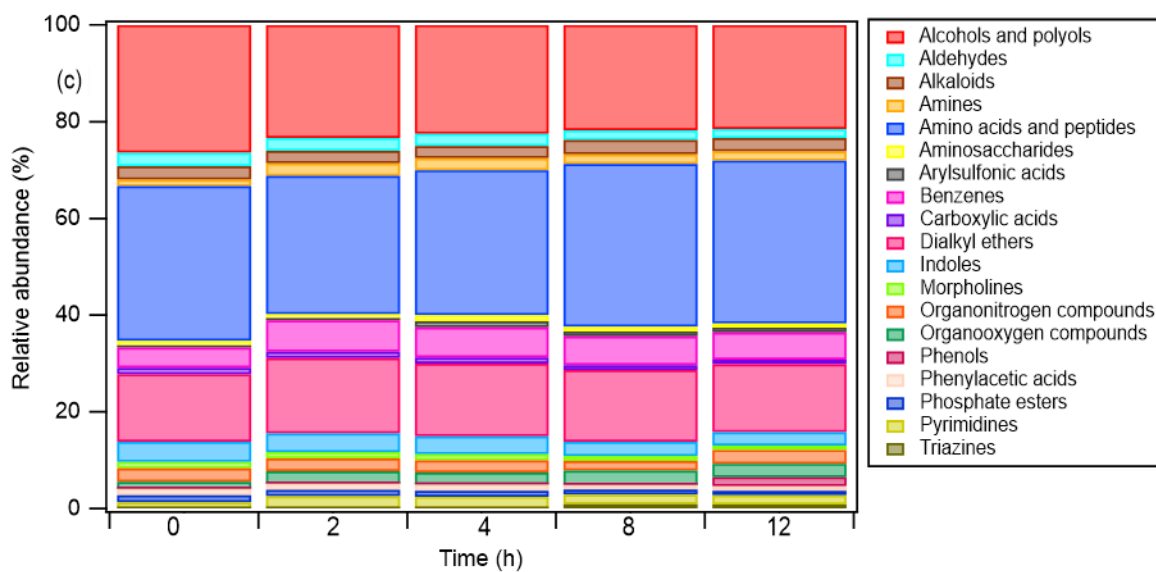

(b) Water-insoluble compounds

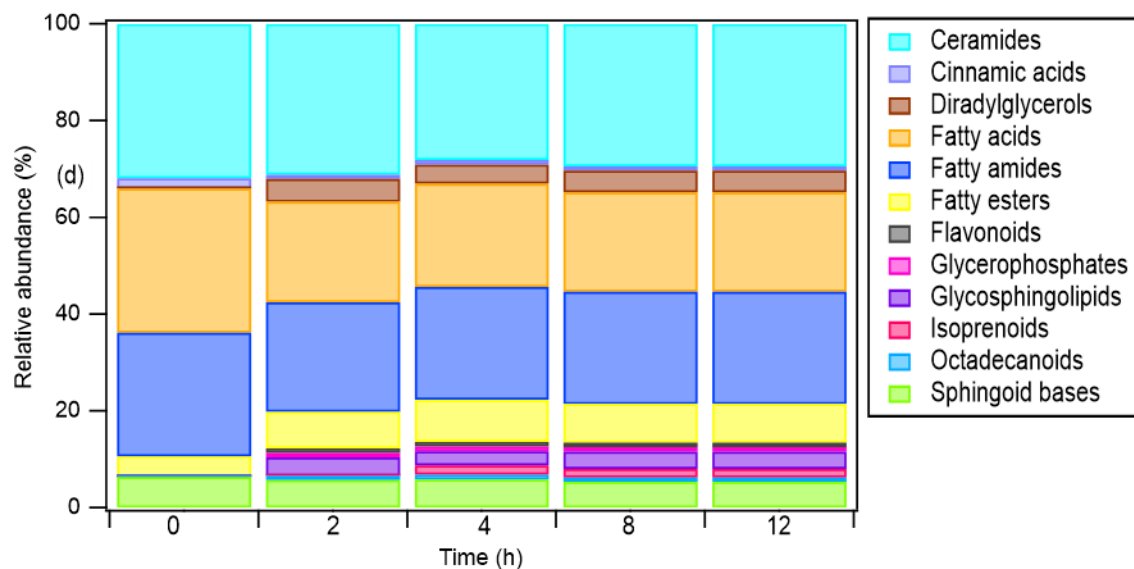

64

65 **Figure S7.** Relative abundance of the different classes of (c) water-soluble compounds, and (d)  
66 water-insoluble compounds from *E. hormaechei* pf0910 during exposure to simulated sunlight  
67 at pH 4.3.



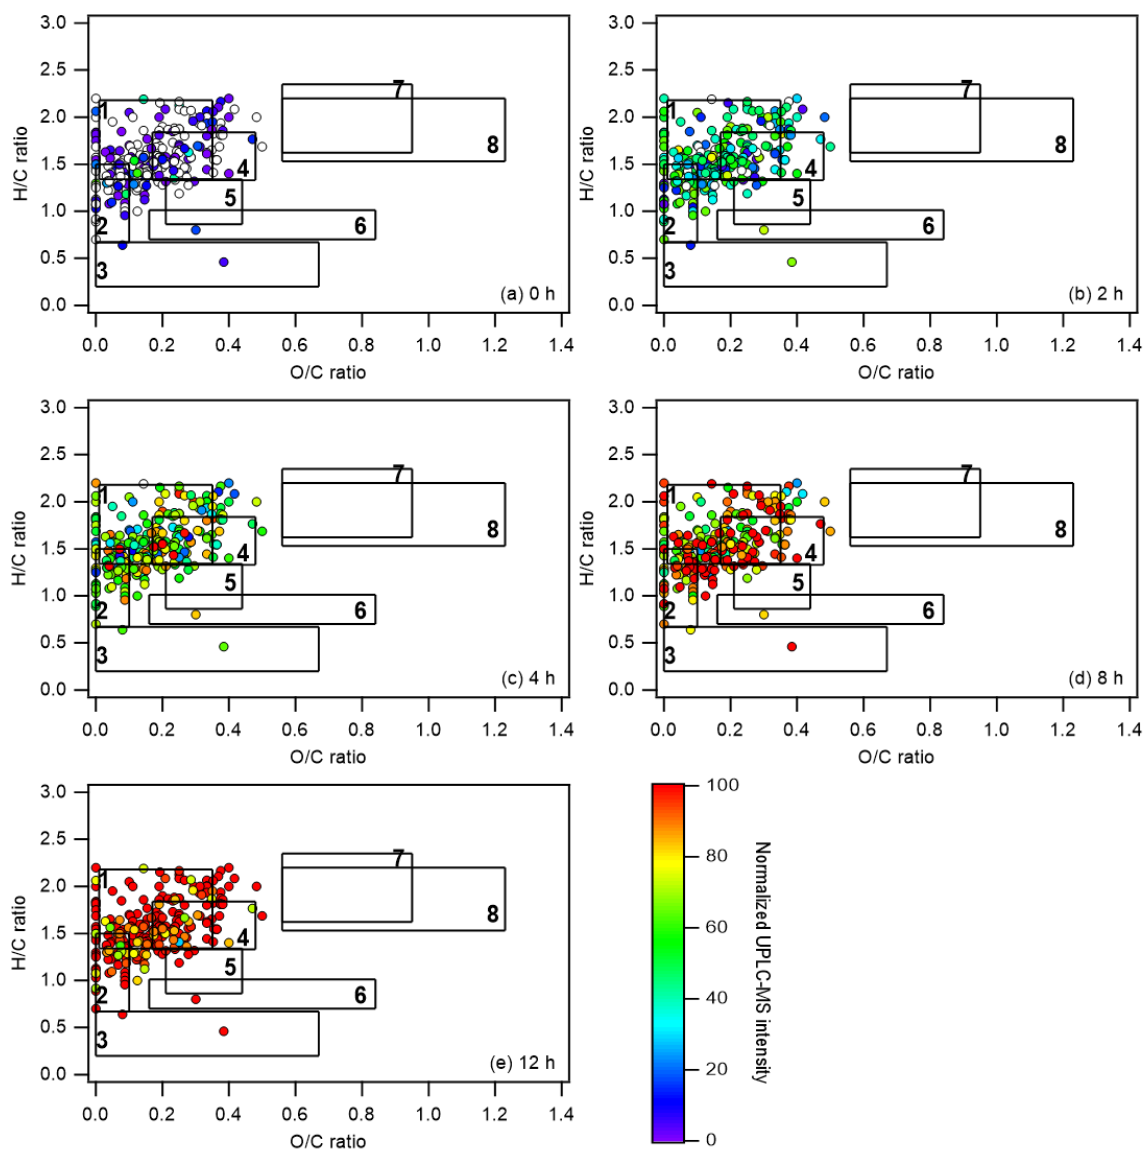

68

69 **Figure S8.** Van Krevelen diagrams of water-soluble compounds from *E. hormaechei* B0910  
70 during exposure to simulated sunlight at pH 4.3 taken at different time points of the experiment:  
71 (a) 0 h, (b) 2 h, (c) 4 h, (d) 8 h, and (e) 12 h. The color of each symbol denotes its UPLC-MS  
72 intensity at that specific time point normalized to its maximum UPLC-MS intensity obtained  
73 during the entire experiment. Symbols that are colored white indicates that these compounds  
74 were not detected at that specific time point. The Van Krevelen diagrams are divided into eight  
75 chemical classes based on their O/C and H/C ratios: (1) lipids, (2) unsaturated hydrocarbons,  
76 (3) condensed aromatic structures, (4) peptides, (5) lignin, (6) tannin, (7) amino sugars, and (8)  
77 carbohydrates.

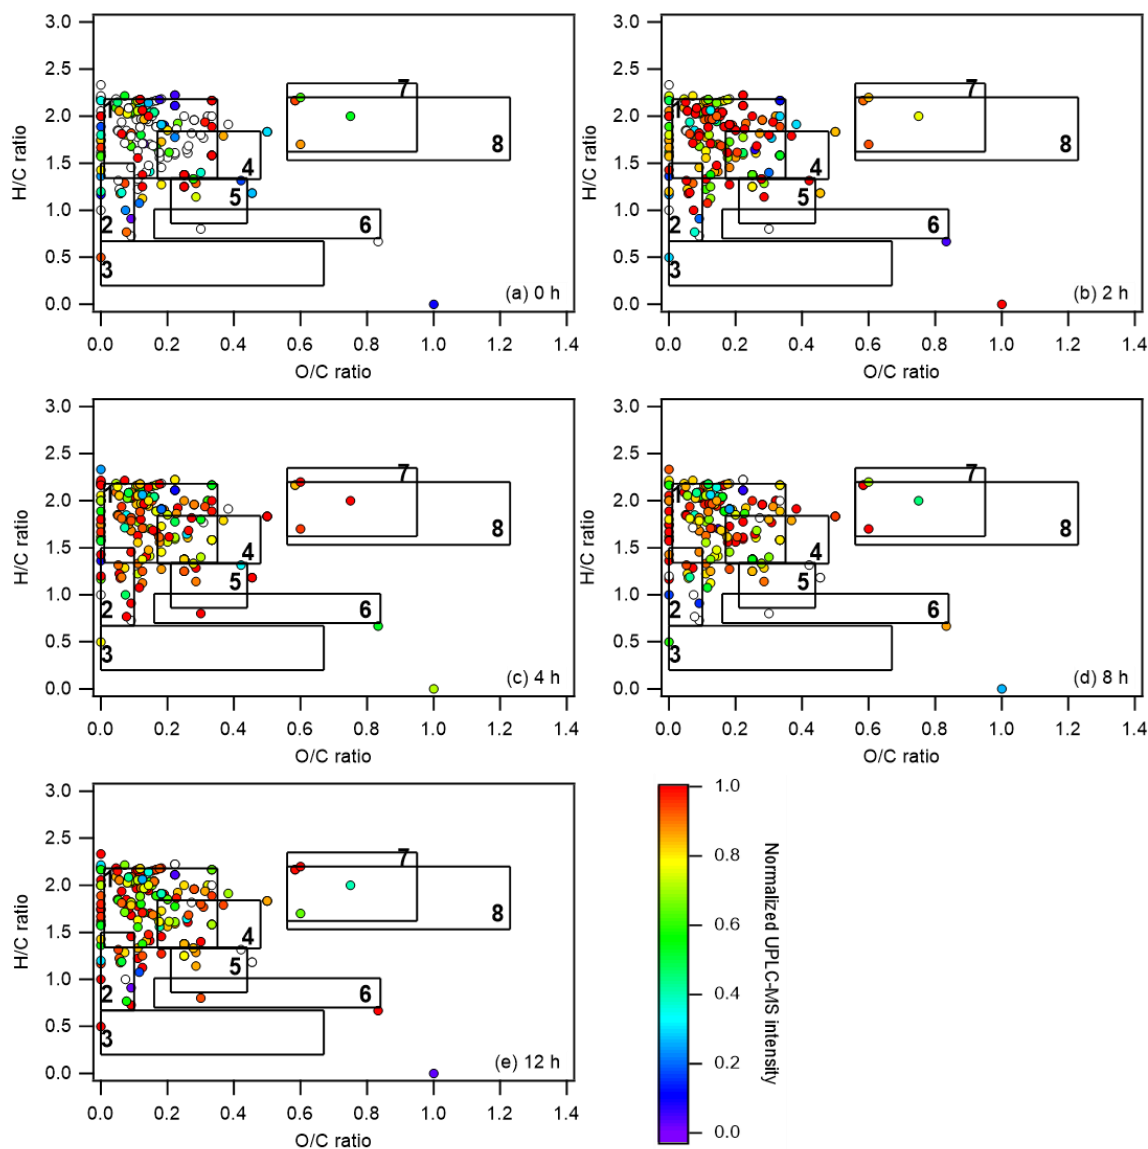

78

79 **Figure S9.** Van Krevelen diagrams of water-insoluble compounds from *E. hormaechei* B0910  
 80 during exposure to simulated sunlight at pH 4.3: (a) 0 h, (b) 2 h, (c) 4 h, (d) 8 h, and (e) 12 h.  
 81 The color of each symbol denotes its UPLC-MS intensity at that specific time point normalized  
 82 to its maximum UPLC-MS intensity obtained during the entire experiment. Symbols that are  
 83 colored white indicates that these compounds were not detected at that specific time point. The  
 84 Van Krevelen diagrams are divided into eight chemical classes based on their O/C and H/C  
 85 ratios: (1) lipids, (2) unsaturated hydrocarbons, (3) condensed aromatic structures, (4) peptides,  
 86 (5) lignin, (6) tannin, (7) amino sugars, and (8) carbohydrates.

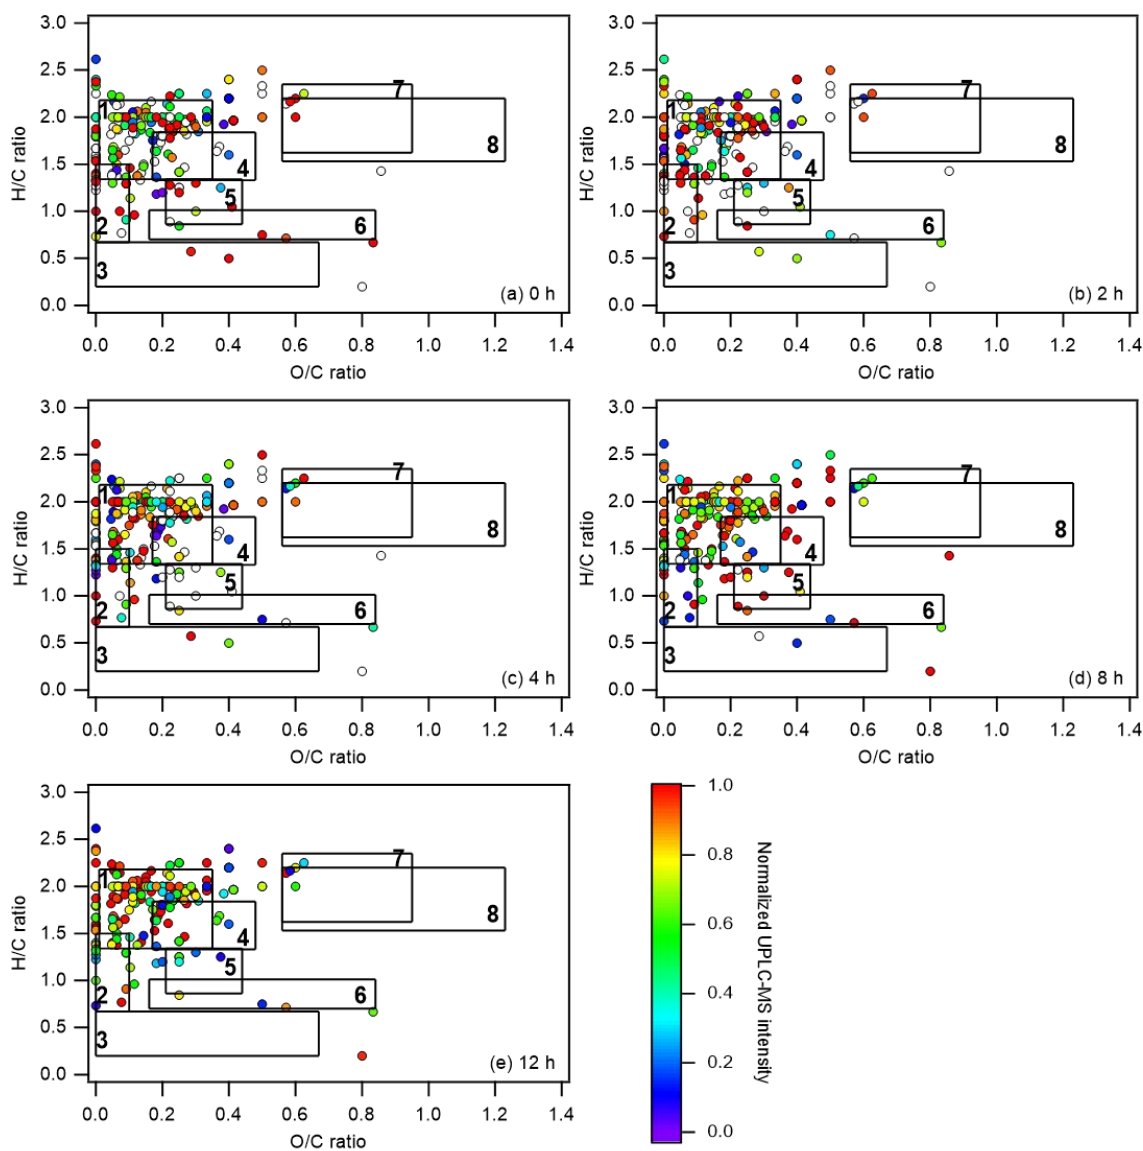

87

88 **Figure S10.** Van Krevelen diagrams of water-soluble compounds from *E. hormaechei* pf0910  
 89 during exposure to simulated sunlight at pH 4.3: (a) 0 h, (b) 2 h, (c) 4 h, (d) 8 h, and (e) 12 h.  
 90 The color of each symbol denotes its UPLC-MS intensity at that specific time point normalized  
 91 to its maximum UPLC-MS intensity obtained during the entire experiment. Symbols that are  
 92 colored white indicates that these compounds were not detected at that specific time point. The  
 93 Van Krevelen diagrams are divided into eight chemical classes based on their O/C and H/C  
 94 ratios: (1) lipids, (2) unsaturated hydrocarbons, (3) condensed aromatic structures, (4) peptides,  
 95 (5) lignin, (6) tannin, (7) amino sugars, and (8) carbohydrates.

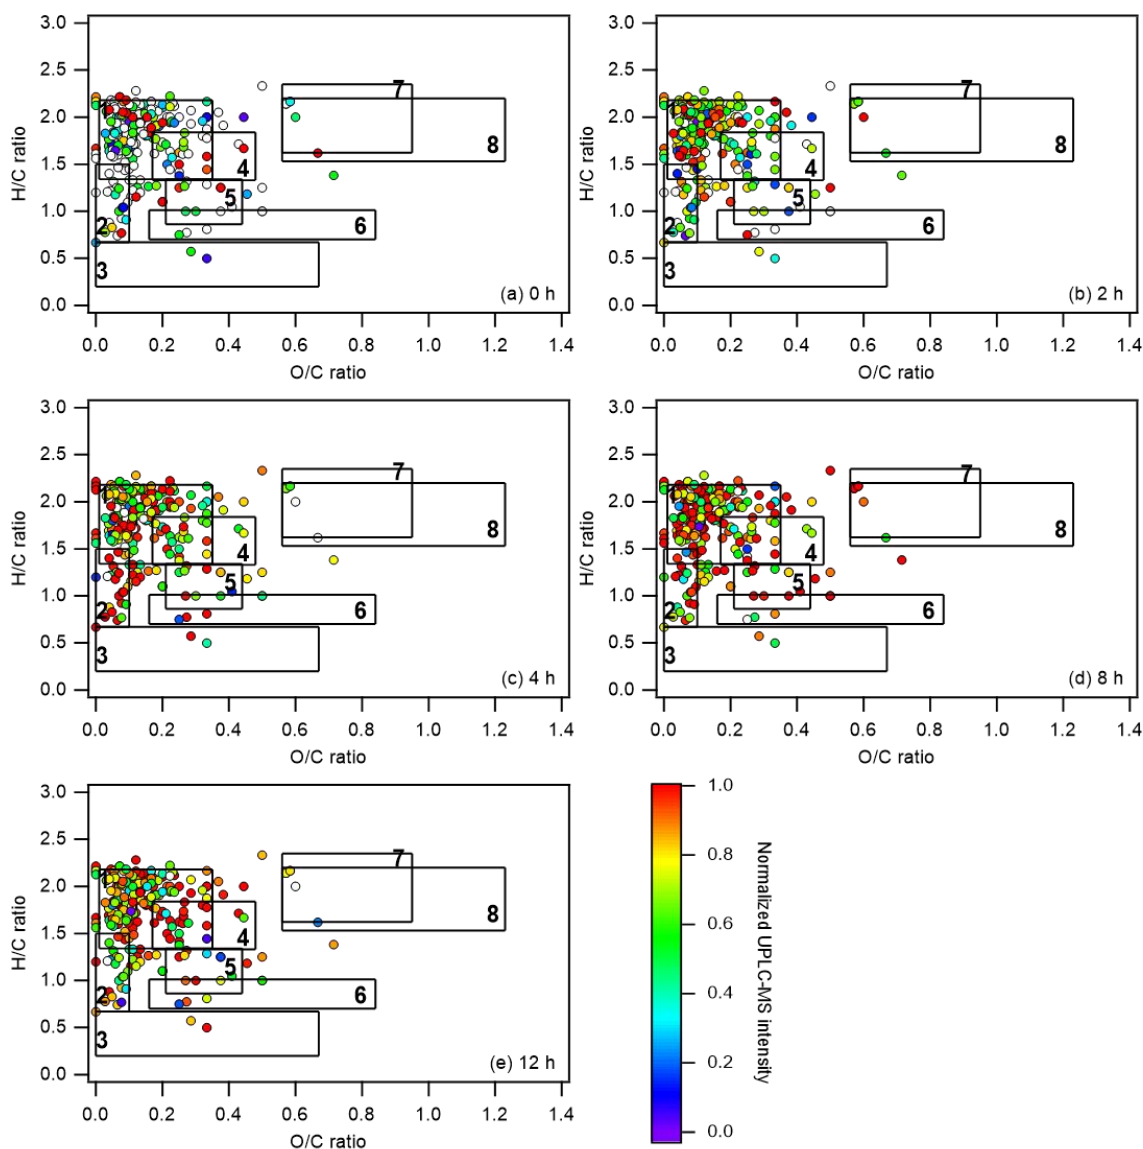

96

97 **Figure S11.** Van Krevelen diagrams of water-insoluble compounds from *E. hormaechei*  
 98 pf0910 during exposure to simulated sunlight at pH 4.3: (a) 0 h, (b) 2 h, (c) 4 h, (d) 8 h, and (e)  
 99 12 h. The color of each symbol denotes its UPLC-MS intensity at that specific time point  
 100 normalized to its maximum UPLC-MS intensity obtained during the entire experiment.  
 101 Symbols that are colored white indicates that these compounds were not detected at that  
 102 specific time point. The Van Krevelen diagrams are divided into eight chemical classes based  
 103 on their O/C and H/C ratios: (1) lipids, (2) unsaturated hydrocarbons, (3) condensed aromatic  
 104 structures, (4) peptides, (5) lignin, (6) tannin, (7) amino sugars, and (8) carbohydrates.

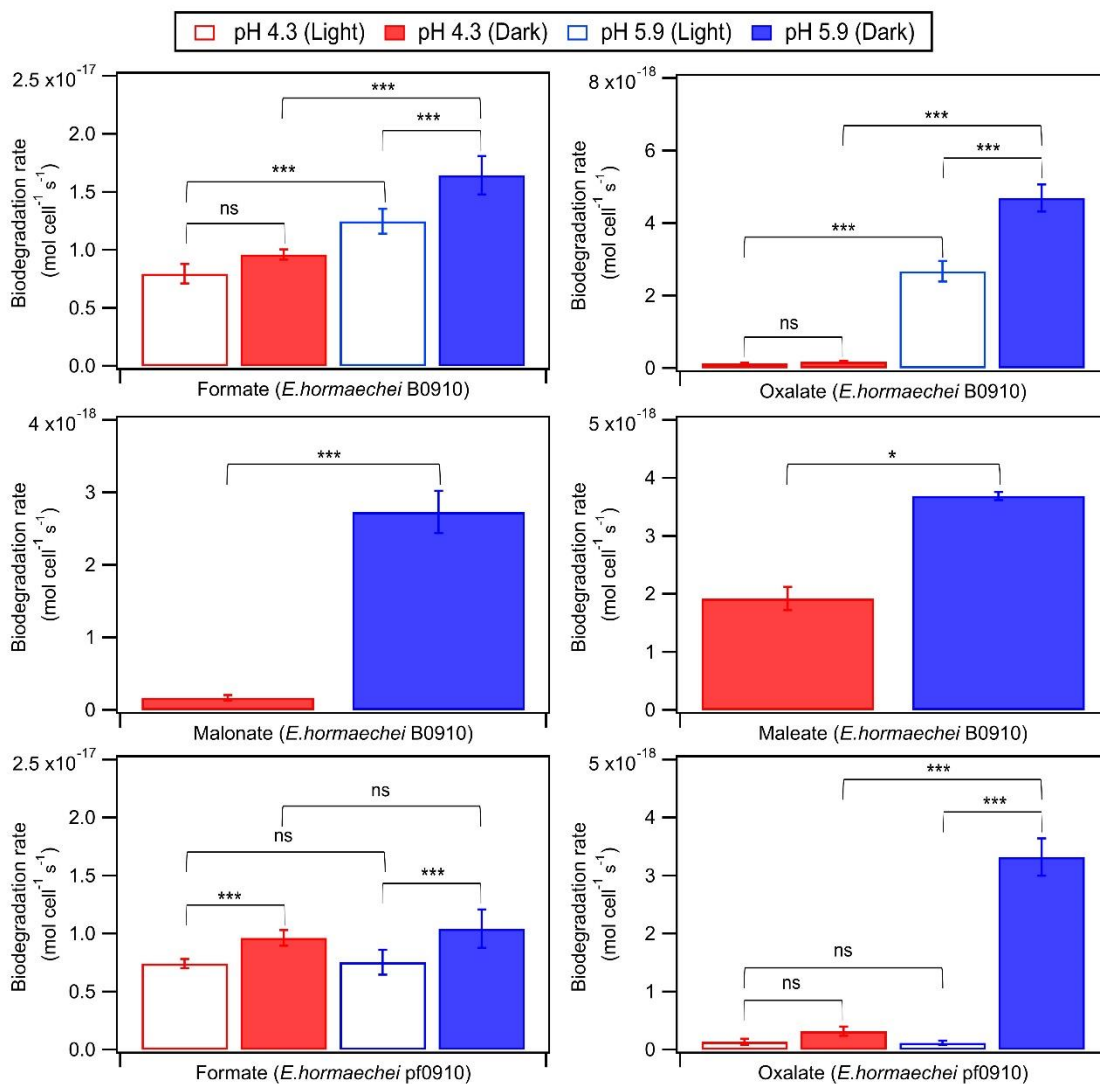

105

106 **Figure S12.** Biodegradation rates of oxalate, maleate, and malonate by (a) *E. hormaechei*  
 107 B0910 and (b) *E. hormaechei* pf0910 under light and dark conditions at pH 4.3 and pH 5.9.  
 108 Error bars represent one standard deviation from the mean of biological triplicates (ns: not  
 109 significant, \*:  $p$  value < 0.05, \*\*:  $p$  value < 0.01, \*\*\*:  $p$  value < 0.001).

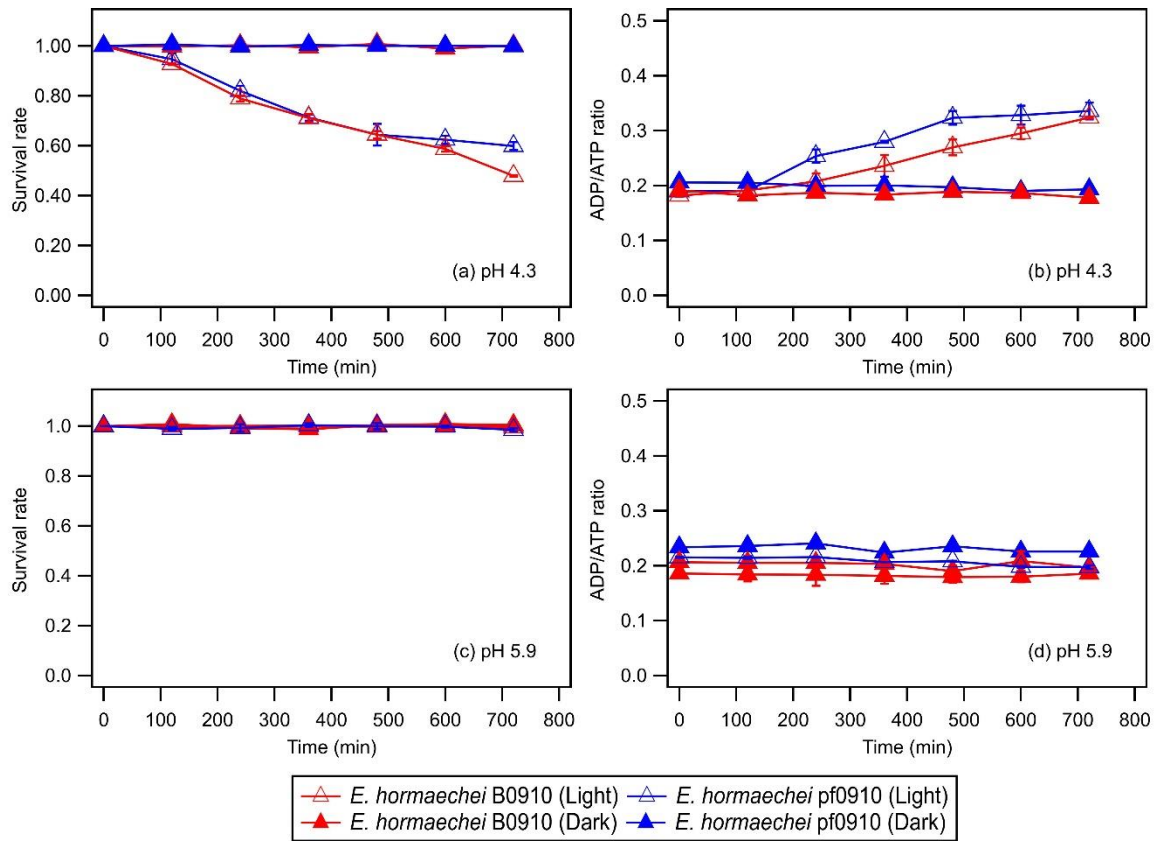

110

111 **Figure S13.** Survival and ADP/ATP ratios of *E. hormaechei* B0910 and *E. hormaechei* pf0910  
 112 under illuminated and dark conditions at pH 4.3 and pH 5.9 in the solutions containing the  
 113 seven carboxylic acids. Error bars represent one standard deviation from the mean of biological  
 114 triplicates.

115

116

117

118

119

120

121

122

123

124

125

126 **Table S1.** Chemical composition of the artificial cloud water used to prepare bacterial cells  
 127 and perform experiments that investigated the effects of cloud water pH and light exposure on  
 128 the survival and energetic metabolism of bacteria. In the experiments, the pH of the artificial  
 129 cloud water was adjusted while keeping the final organic and inorganic ion composition the  
 130 same.

| Organic ion | $\mu\text{M}$ | Inorganic ion      | $\mu\text{M}$ |
|-------------|---------------|--------------------|---------------|
| Formate     | 17.1          | $\text{Na}^+$      | 93            |
| Acetate     | 10.2          | $\text{NH}_4^+$    | 235           |
| Pyruvate    | 2.7           | $\text{K}^+$       | 8             |
| Oxalate     | 10.3          | $\text{Mg}^{2+}$   | 23            |
|             |               | $\text{Ca}^{2+}$   | 49            |
|             |               | $\text{Cl}^-$      | 138           |
|             |               | $\text{SO}_4^{2-}$ | 305           |

131

132

133

134 **Table S2.** Chemical composition of the artificial cloud water used for carboxylic acid  
 135 biodegradation experiments.

| Organic ion | $\mu\text{M}$ | Inorganic ion      | $\mu\text{M}$ |
|-------------|---------------|--------------------|---------------|
| Formate     | 50            | $\text{Na}^+$      | 930           |
| Acetate     | 50            | $\text{NH}_4^+$    | 2350          |
| Pyruvate    | 50            | $\text{K}^+$       | 80            |
| Oxalate     | 50            | $\text{Mg}^{2+}$   | 230           |
| Succinate   | 50            | $\text{Ca}^{2+}$   | 490           |
| Maleate     | 50            | $\text{Cl}^-$      | 1380          |
| Malonate    | 50            | $\text{SO}_4^{2-}$ | 3050          |
| Glutarate   | 50            |                    |               |
| MSA         | 50            |                    |               |

136

137

138

139

140

141

142 **Table S3.** Stoichiometric ranges of the eight chemical classes in VK diagrams (Bianco et al.,  
 143 2018; Laszakovits and Mackay, 2022).

| <b>Chemical class</b>                               | <b>H/C</b>                       | <b>O/C</b>                       |
|-----------------------------------------------------|----------------------------------|----------------------------------|
| Amino sugar (Laszakovits and Mackay, 2022)          | $1.62 \leq \text{H/C} \leq 2.35$ | $0.56 \leq \text{O/C} \leq 0.95$ |
| Carbohydrate (Laszakovits and Mackay, 2022)         | $1.53 \leq \text{H/C} \leq 2.20$ | $0.56 \leq \text{O/C} \leq 1.23$ |
| Lignin (Laszakovits and Mackay, 2022)               | $0.86 \leq \text{H/C} \leq 1.34$ | $0.21 \leq \text{O/C} \leq 0.44$ |
| Lipid (Laszakovits and Mackay, 2022)                | $1.34 \leq \text{H/C} \leq 2.18$ | $0.01 \leq \text{O/C} \leq 0.35$ |
| Peptide (Laszakovits and Mackay, 2022)              | $1.33 \leq \text{H/C} \leq 1.84$ | $0.17 \leq \text{O/C} \leq 0.48$ |
| Tannin (Laszakovits and Mackay, 2022)               | $0.70 \leq \text{H/C} \leq 1.01$ | $0.16 \leq \text{O/C} \leq 0.84$ |
| Unsaturated hydrocarbons (Bianco et al., 2018)      | $0.67 \leq \text{H/C} \leq 1.5$  | $0 \leq \text{O/C} \leq 0.10$    |
| Condensed aromatic structures (Bianco et al., 2018) | $0.20 \leq \text{H/C} \leq 0.67$ | $0 \leq \text{O/C} \leq 0.67$    |

144



145 **Table S4.** Genes involved in the biodegradation of carboxylic acids in the two *E. hormaechei*  
 146 strains.

| Carboxylic acid | Genes                                               | <i>E. hormaechei</i> B0910 |                                                                                            | <i>E. hormaechei</i> pf0910 |                                                                                            |
|-----------------|-----------------------------------------------------|----------------------------|--------------------------------------------------------------------------------------------|-----------------------------|--------------------------------------------------------------------------------------------|
|                 |                                                     | Biodegradation             | CDS                                                                                        | Biodegradation              | CDS                                                                                        |
|                 |                                                     | Yes/No                     | Absent/Present                                                                             | Yes/No                      | Absent/Present                                                                             |
| Formic acid     | Formate dehydrogenase                               | Yes                        | AECJMNAI_01279;<br>AECJMNAI_01280;<br>AECJMNAI_01281;<br>AECJMNAI_03442                    | Yes                         | CFAIMJNC_02488;<br>CFAIMJNC_02489;<br>CFAIMJNC_02490;<br>CFAIMJNC_04681                    |
|                 | Oxalate decarboxylase                               | Yes                        | Absent                                                                                     | Yes                         | Absent                                                                                     |
|                 | Oxalate oxidase                                     | Yes                        | Absent                                                                                     | Yes                         | Absent                                                                                     |
| Oxalic acid     | Formyl-CoA:oxalate CoA-transferase                  | Yes                        | Absent                                                                                     | Yes                         | Absent                                                                                     |
|                 | Succinyl-CoA:oxalate CoA-transferase                | Yes                        | Absent                                                                                     | Yes                         | Absent                                                                                     |
|                 | Hypothetical protein (Cupin 2 protein) <sup>a</sup> | Yes                        | AECJMNAI_00423                                                                             | Yes                         | CFAIMJNC_01624                                                                             |
| Malonic acid    | Malonate decarboxylase                              | Yes                        | AECJMNAI_00917;<br>AECJMNAI_00920;<br>AECJMNAI_00921;<br>AECJMNAI_00922;<br>AECJMNAI_00924 | No                          | CFAIMJNC_02108;<br>CFAIMJNC_02111;<br>CFAIMJNC_02112;<br>CFAIMJNC_02113;<br>CFAIMJNC_02115 |
|                 | Malonate CoA-transferase                            | Yes                        | Absent                                                                                     | No                          | Absent                                                                                     |
|                 | Malonate-semialdehyde dehydrogenase                 | Yes                        | Absent                                                                                     | No                          | Absent                                                                                     |
|                 | Malonyl-CoA/methylmalonyl-CoA synthetase            | Yes                        | Absent                                                                                     | No                          | Absent                                                                                     |
|                 | Maleate isomerase                                   | Yes                        | Absent                                                                                     | No                          | Absent                                                                                     |
|                 | Maleate hydratase                                   | Yes                        | Absent                                                                                     | No                          | Absent                                                                                     |
|                 | 3-isopropylmalate dehydratase <sup>a</sup>          | Yes                        | AECJMNAI_02091;<br>AECJMNAI_02092                                                          | No                          | CFAIMJNC_03425;<br>CFAIMJNC_03426                                                          |
| Acetic acid     | Acetyl-CoA synthetase                               | No                         | AECJMNAI_01727                                                                             | No                          | CFAIMJNC_02972                                                                             |
|                 | Acetate kinase                                      | No                         | AECJMNAI_04676                                                                             | No                          | CFAIMJNC_00936                                                                             |
|                 | Aldehyde dehydrogenase                              | No                         | AECJMNAI_01165                                                                             | No                          | CFAIMJNC_02371                                                                             |

|                       |                                                                                          |    |                                   |    |                                   |
|-----------------------|------------------------------------------------------------------------------------------|----|-----------------------------------|----|-----------------------------------|
|                       | ActP <sup>b</sup>                                                                        | No | AECJMNAI_01725                    | No | CFAIMJNC_02970                    |
|                       | SatP <sup>b</sup>                                                                        | No | AECJMNAI_02044                    | No | CFAIMJNC_03365                    |
| Methane sulfonic acid | Alkanesulfonate monooxygenase                                                            | No | AECJMNAI_03015;<br>AECJMNAI_03017 | No | CFAIMJNC_04351;<br>CFAIMJNC_04353 |
| Glutaric acid         | Succinate-semialdehyde dehydrogenase / glutarate-semialdehyde dehydrogenase <sup>c</sup> | No | AECJMNAI_00812;<br>AECJMNAI_01960 | No | CFAIMJNC_02004;<br>CFAIMJNC_03281 |
|                       | Glutaryl-CoA synthetase                                                                  | No | Absent                            | No | Absent                            |
|                       | Glutarate dioxygenase                                                                    | No | Absent                            | No | Absent                            |

147 <sup>a</sup> Genes are not canonical but may involve in the biodegradation of carboxylic acids.

148 <sup>b</sup> Transporter proteins involved in uptake of acetic acid for biodegradation

149 <sup>c</sup> No reverse catalysis in the direction from glutarate to glutarate-semialdehyde has been  
150 reported in the literature.

151

152

153 **Table S5.** Concentration of radicals and cells used to estimate the loss rates by biodegradation

154 and chemical reactions in Table S6.

| Radical concentration/<br>Cell concentration | Area   | Concentration         | Reference               |
|----------------------------------------------|--------|-----------------------|-------------------------|
| ·OH (M)                                      | Remote | $2.2 \times 10^{-14}$ | (Herrmann et al., 2010) |
|                                              | Marine | $2.0 \times 10^{-12}$ | (Herrmann et al., 2010) |
|                                              | Urban  | $3.5 \times 10^{-15}$ | (Herrmann et al., 2010) |
| NO <sub>3</sub> · (M)                        | Remote | $5.1 \times 10^{-15}$ | (Herrmann et al., 2010) |
|                                              | Marine | $6.9 \times 10^{-15}$ | (Herrmann et al., 2010) |
|                                              | Urban  | $1.4 \times 10^{-13}$ | (Herrmann et al., 2010) |
| Cell (cell L <sup>-1</sup> )                 |        | $8.0 \times 10^7$     | (Amato et al., 2007)    |

155

156 **Table S6.** Estimations of the loss rates of formate, oxalate, and malonate by biodegradation and chemical reactions (i.e.,  $\cdot\text{OH}$  oxidation (daytime) and  $\text{NO}_3\cdot$  (nighttime)). These loss rates were calculated based on  
 157 concentrations and pH measured at the different sites. Equations used in these calculations can be found in Section S6. References used to obtain the pH of cloud/rainwater and carboxylic acids are indicated in superscripts.  
 158 The biodegradation and chemical reaction loss rates calculated here were used to generate Figure 5.

159 **Daytime**

| Location (remote)                               | Category | pH                              | Formate ( $\mu\text{M}$ )    | Formate loss rate ( $\text{M s}^{-1}$ ) |                        |                           | Oxalate ( $\mu\text{M}$ )        | Oxalate loss rate ( $\text{M s}^{-1}$ ) |                        |                           |
|-------------------------------------------------|----------|---------------------------------|------------------------------|-----------------------------------------|------------------------|---------------------------|----------------------------------|-----------------------------------------|------------------------|---------------------------|
|                                                 |          |                                 |                              | bio (pH ~4)                             | bio (pH ~5)            | $\cdot\text{OH}$ (remote) |                                  | bio (pH ~4)                             | bio (pH ~5)            | $\cdot\text{OH}$ (remote) |
| Mount Lu(Sun et al., 2016)                      | Cloud    | 3.81 (Sun et al., 2016)         | 10.83 (Sun et al., 2016)     | $1.34 \times 10^{-10}$                  |                        | $5.72 \times 10^{-10}$    | 4.95 (Sun et al., 2016)          | $1.06 \times 10^{-12}$                  |                        | $1.74 \times 10^{-11}$    |
| Mount Lu(Sun et al., 2016)                      | Rain     | 4.44 (Sun et al., 2016)         | 10.21 (Sun et al., 2016)     | $1.26 \times 10^{-10}$                  |                        | $5.39 \times 10^{-10}$    | 2.54 (Sun et al., 2016)          | $5.44 \times 10^{-13}$                  |                        | $8.92 \times 10^{-12}$    |
| Mount Heng(Wang et al., 2011)                   | Cloud    | 3.8 (Wang et al., 2011)         | 19.65 (Wang et al., 2011)    | $2.43 \times 10^{-10}$                  |                        | $1.04 \times 10^{-9}$     | 5.11 (Wang et al., 2011)         | $1.10 \times 10^{-12}$                  |                        | $1.80 \times 10^{-11}$    |
| Mount Heng(Wang et al., 2011)                   | Rain     | 4.35 (Wang et al., 2011)        | 14.30 (Wang et al., 2011)    | $1.77 \times 10^{-10}$                  |                        | $7.55 \times 10^{-10}$    | 1.66 (Wang et al., 2011)         | $3.55 \times 10^{-13}$                  |                        | $5.83 \times 10^{-12}$    |
| Mangdang Mountain(Cheng et al., 2011)           | Rain     | 4.81 (Cheng et al., 2011)       | 7.90 (Cheng et al., 2011)    | $9.78 \times 10^{-11}$                  |                        | $4.17 \times 10^{-10}$    | 1.80 (Cheng et al., 2011)        | $3.86 \times 10^{-13}$                  |                        | $6.34 \times 10^{-12}$    |
| Taiwan(Tsai and Kuo, 2013)                      | Cloud    | 3.91 (Tsai and Kuo, 2013)       | 5.74 (Tsai and Kuo, 2013)    | $7.11 \times 10^{-11}$                  |                        | $3.03 \times 10^{-10}$    | 6.60 (Tsai and Kuo, 2013)        | $1.42 \times 10^{-12}$                  |                        | $2.32 \times 10^{-11}$    |
| Kleiner Feldberg, Germany(Wobrock et al., 1994) | Cloud    | 3.9-4.6 (Wobrock et al., 1994)  | 3.26 (Wobrock et al., 1994)  | $4.03 \times 10^{-11}$                  |                        | $1.72 \times 10^{-10}$    | ND                               |                                         |                        |                           |
| Whiteface Mountain, USA(Khwaja et al., 1995)    | Cloud    | 3.1-4.4 (Khwaja et al., 1995)   | 25.20 (Khwaja et al., 1995)  | $3.12 \times 10^{-10}$                  |                        | $1.33 \times 10^{-9}$     | 9.66 (Khwaja et al., 1995)       | $2.07 \times 10^{-12}$                  |                        | $3.40 \times 10^{-11}$    |
| Rax, Austria(Löflund et al., 2002)              | Cloud    | 3.84 (Löflund et al., 2002)     | 13.25 (Löflund et al., 2002) | $1.64 \times 10^{-10}$                  |                        | $7.00 \times 10^{-10}$    | 5.11 (Löflund et al., 2002)      | $1.10 \times 10^{-12}$                  |                        | $1.80 \times 10^{-11}$    |
| Sonnblick, Austria(Brantner et al., 1994)       | Cloud    | 5.0-6.5 (Brantner et al., 1994) | 6.30 (Brantner et al., 1994) |                                         | $9.79 \times 10^{-11}$ | $3.33 \times 10^{-10}$    | 1.89 (Limbeck and Puxbaum, 2000) |                                         | $3.61 \times 10^{-12}$ | $6.65 \times 10^{-12}$    |
| Mount Tai, China(Guo et al., 2012)              | Cloud    | 4.6 (Guo et al., 2012)          | 31.80 (Guo et al., 2012)     | $3.94 \times 10^{-10}$                  |                        | $1.68 \times 10^{-9}$     | 11.10 (Guo et al., 2012)         | $2.38 \times 10^{-12}$                  |                        | $3.91 \times 10^{-11}$    |
| Shangzhong(Xu et al., 2009)                     | Rain     | ND                              | 4.95 (Xu et al., 2009)       | $6.13 \times 10^{-11}$                  |                        | $2.61 \times 10^{-10}$    | 1.16 (Xu et al., 2009)           | $2.48 \times 10^{-13}$                  |                        | $4.07 \times 10^{-12}$    |
| São Paulo State, Brazil(Coelho et al., 2011)    | Rain     | 4.96 (Coelho et al., 2011)      | 7.80 (Coelho et al., 2011)   |                                         | $1.21 \times 10^{-10}$ | $4.12 \times 10^{-10}$    | 1.20 (Coelho et al., 2011)       |                                         | $2.29 \times 10^{-12}$ | $4.22 \times 10^{-12}$    |

  

| Location (Marine)               | Category | pH                       | Formate ( $\mu\text{M}$ ) | Formate loss rate ( $\text{M s}^{-1}$ ) |                        |                           | Oxalate ( $\mu\text{M}$ ) | Oxalate loss rate ( $\text{M s}^{-1}$ ) |                        |                           |
|---------------------------------|----------|--------------------------|---------------------------|-----------------------------------------|------------------------|---------------------------|---------------------------|-----------------------------------------|------------------------|---------------------------|
|                                 |          |                          |                           | bio (pH ~4)                             | bio (pH ~5)            | $\cdot\text{OH}$ (marine) |                           | bio (pH ~4)                             | bio (pH ~5)            | $\cdot\text{OH}$ (marine) |
| Puerto Rico                     | Cloud    | 5.5 (Gioda et al., 2011) | 1.00 (Gioda et al., 2011) |                                         | $1.55 \times 10^{-11}$ | $4.80 \times 10^{-9}$     | 0.50 (Gioda et al., 2011) |                                         | $9.55 \times 10^{-13}$ | $1.60 \times 10^{-10}$    |
| Puerto Rico(Gioda et al., 2011) | Rain     | 5.3 (Gioda et al., 2011) | 0.20 (Gioda et al., 2011) |                                         | $3.11 \times 10^{-12}$ | $9.60 \times 10^{-10}$    | 0.00 (Gioda et al., 2011) |                                         |                        |                           |

|                                       |       |                                   |                                    |                        |                       |                                    |                        |                        |
|---------------------------------------|-------|-----------------------------------|------------------------------------|------------------------|-----------------------|------------------------------------|------------------------|------------------------|
| Puy de dome(Vaitilingom et al., 2013) | Cloud | 6.1<br>(Vaitilingom et al., 2013) | 4.90<br>(Vaitilingom et al., 2013) | $7.61 \times 10^{-11}$ | $2.35 \times 10^{-8}$ | 1.00<br>(Vaitilingom et al., 2013) | $1.91 \times 10^{-12}$ | $3.20 \times 10^{-10}$ |
|---------------------------------------|-------|-----------------------------------|------------------------------------|------------------------|-----------------------|------------------------------------|------------------------|------------------------|

| Location (Urban)                          | Category | pH                                | Formate ( $\mu\text{M}$ )           | Formate loss rate ( $\text{M s}^{-1}$ ) |             |                          | Oxalate ( $\mu\text{M}$ )          | Oxalate loss rate ( $\text{M s}^{-1}$ ) |             |                          |
|-------------------------------------------|----------|-----------------------------------|-------------------------------------|-----------------------------------------|-------------|--------------------------|------------------------------------|-----------------------------------------|-------------|--------------------------|
|                                           |          |                                   |                                     | bio (pH ~4)                             | bio (pH ~5) | $\cdot\text{OH}$ (urban) |                                    | bio (pH ~4)                             | bio (pH ~5) | $\cdot\text{OH}$ (urban) |
| Shenzhen, South China(Huang et al., 2010) | Rain     | 4.56 (Huang et al., 2010)         | 2.26 (Huang et al., 2010)           | $2.80 \times 10^{-11}$                  |             | $1.90 \times 10^{-11}$   | 0.58 (Huang et al., 2010)          | $1.23 \times 10^{-13}$                  |             | $3.22 \times 10^{-13}$   |
| Anshun(Zhang et al., 2011)                | Rain     | 4.67 (Zhang et al., 2011)         | 8.77 (Zhang et al., 2011)           | $1.09 \times 10^{-10}$                  |             | $7.37 \times 10^{-11}$   | 2.84 (Zhang et al., 2011)          | $6.09 \times 10^{-13}$                  |             | $1.59 \times 10^{-12}$   |
| Newark US East Coast(Song and Gao, 2009)  | Rain     | 4.6 (Song and Gao, 2009)          | 4.44 (Song and Gao, 2009)           | $5.50 \times 10^{-11}$                  |             | $3.73 \times 10^{-11}$   | 0.68 (Song and Gao, 2009)          | $1.46 \times 10^{-13}$                  |             | $3.81 \times 10^{-13}$   |
| Hong Kong SAR(Li et al., 2020)            | Cloud    | 3.87 (Li et al., 2020)            | 17.10 (Li et al., 2020)             | $2.12 \times 10^{-10}$                  |             | $1.44 \times 10^{-10}$   | 10.30 (Li et al., 2020)            | $2.21 \times 10^{-12}$                  |             | $5.77 \times 10^{-12}$   |
| Puy de dome(Vaitilingom et al., 2013)     | Cloud    | 3.9<br>(Vaitilingom et al., 2013) | 33.20<br>(Vaitilingom et al., 2013) | $4.11 \times 10^{-10}$                  |             | $2.79 \times 10^{-10}$   | 9.30<br>(Vaitilingom et al., 2013) | $1.99 \times 10^{-12}$                  |             | $5.21 \times 10^{-12}$   |

160 ND: No data

161 **Nighttime**

| Location (remote)                               | Category | pH                                 | Formate ( $\mu\text{M}$ )    | Formate loss rate ( $\text{M s}^{-1}$ ) |                        |                             | Oxalate ( $\mu\text{M}$ )           | Oxalate loss rate ( $\text{M s}^{-1}$ ) |                        |                             | Malonate ( $\mu\text{M}$ )       | Malonate loss rate ( $\text{M s}^{-1}$ ) |                        |                             |
|-------------------------------------------------|----------|------------------------------------|------------------------------|-----------------------------------------|------------------------|-----------------------------|-------------------------------------|-----------------------------------------|------------------------|-----------------------------|----------------------------------|------------------------------------------|------------------------|-----------------------------|
|                                                 |          |                                    |                              | bio (pH ~4)                             | bio (pH ~5)            | $\text{NO}_3\cdot$ (remote) |                                     | bio (pH ~4)                             | bio (pH ~5)            | $\text{NO}_3\cdot$ (remote) |                                  | bio (pH ~4)                              | bio (pH ~5)            | $\text{NO}_3\cdot$ (remote) |
| Mount Lu(Sun et al., 2016)                      | Cloud    | 3.81 (Sun et al., 2016)            | 10.83 (Sun et al., 2016)     | $1.69 \times 10^{-10}$                  |                        | $2.32 \times 10^{-12}$      | 4.95 (Sun et al., 2016)             | $2.07 \times 10^{-12}$                  |                        | $1.11 \times 10^{-12}$      | ND                               |                                          |                        |                             |
| Mount Lu(Sun et al., 2016)                      | Rain     | 4.44 (Sun et al., 2016)            | 10.21 (Sun et al., 2016)     | $1.59 \times 10^{-10}$                  |                        | $2.19 \times 10^{-12}$      | 2.54 (Sun et al., 2016)             | $1.06 \times 10^{-12}$                  |                        | $5.69 \times 10^{-13}$      | ND                               |                                          |                        |                             |
| Mount Heng(Wang et al., 2011)                   | Cloud    | 3.8 (Wang et al., 2011)            | 19.65 (Wang et al., 2011)    | $3.06 \times 10^{-10}$                  |                        | $4.21 \times 10^{-12}$      | 5.11 (Wang et al., 2011)            | $2.14 \times 10^{-12}$                  |                        | $1.15 \times 10^{-12}$      | ND                               |                                          |                        |                             |
| Mount Heng(Wang et al., 2011)                   | Rain     | 4.35 (Wang et al., 2011)           | 14.30 (Wang et al., 2011)    | $2.23 \times 10^{-10}$                  |                        | $3.06 \times 10^{-12}$      | 1.66 (Wang et al., 2011)            | $6.94 \times 10^{-13}$                  |                        | $3.71 \times 10^{-13}$      | ND                               |                                          |                        |                             |
| Mangdang Mountain(Cheng et al., 2011)           | Rain     | 4.81<br>(Cheng et al., 2011)       | 7.90 (Cheng et al., 2011)    | $1.23 \times 10^{-10}$                  |                        | $1.69 \times 10^{-12}$      | 1.80<br>(Cheng et al., 2011)        | $7.55 \times 10^{-13}$                  |                        | $4.04 \times 10^{-13}$      | 1.40 (Cheng et al., 2011)        |                                          | $5.16 \times 10^{-12}$ | $4.00 \times 10^{-14}$      |
| Taiwan(Tsai and Kuo, 2013)                      | Cloud    | 3.91 (Tsai and Kuo, 2013)          | 5.74 (Tsai and Kuo, 2013)    | $8.95 \times 10^{-11}$                  |                        | $1.23 \times 10^{-12}$      | 6.60 (Tsai and Kuo, 2013)           | $2.77 \times 10^{-12}$                  |                        | $1.48 \times 10^{-12}$      | 0.16 (Tsai and Kuo, 2013)        | $3.65 \times 10^{-14}$                   |                        | $4.57 \times 10^{-15}$      |
| Kleiner Feldberg, Germany(Wobrock et al., 1994) | Cloud    | 3.9-4.6<br>(Wobrock et al., 1994)  | 3.26 (Wobrock et al., 1994)  | $5.08 \times 10^{-11}$                  |                        | $6.98 \times 10^{-13}$      | ND                                  |                                         |                        |                             | ND                               |                                          |                        |                             |
| Whiteface Mountain, USA(Khwaja et al., 1995)    | Cloud    | 3.1-4.4<br>(Khwaja et al., 1995)   | 25.20 (Khwaja et al., 1995)  | $3.93 \times 10^{-10}$                  |                        | $5.40 \times 10^{-12}$      | 9.66<br>(Khwaja et al., 1995)       | $4.05 \times 10^{-12}$                  |                        | $2.17 \times 10^{-12}$      | 7.69 (Khwaja et al., 1995)       | $1.75 \times 10^{-12}$                   |                        | $2.20 \times 10^{-13}$      |
| Rax, Austria(Löflund et al., 2002)              | Cloud    | 3.84<br>(Löflund et al., 2002)     | 13.25 (Löflund et al., 2002) | $2.07 \times 10^{-10}$                  |                        | $2.84 \times 10^{-12}$      | 5.11<br>(Löflund et al., 2002)      | $2.14 \times 10^{-12}$                  |                        | $1.15 \times 10^{-12}$      | 1.92 (Löflund et al., 2002)      | $4.38 \times 10^{-13}$                   |                        | $5.49 \times 10^{-14}$      |
| Sonnblick, Austria(Brantner et al., 1994)       | Cloud    | 5.0-6.5<br>(Brantner et al., 1994) | 6.30 (Brantner et al., 1994) |                                         | $1.32 \times 10^{-10}$ | $1.35 \times 10^{-12}$      | 1.89<br>(Limbeck and Puxbaum, 2000) |                                         | $1.19 \times 10^{-11}$ | $4.24 \times 10^{-13}$      | 0.38 (Limbeck and Puxbaum, 2000) |                                          | $1.42 \times 10^{-12}$ | $1.10 \times 10^{-14}$      |
| Mount Tai, China(Guo et al., 2012)              | Cloud    | 4.6 (Guo et al., 2012)             | 31.80                        | $4.96 \times 10^{-10}$                  |                        | $6.81 \times 10^{-12}$      | 11.10 (Guo et al., 2012)            | $4.65 \times 10^{-12}$                  |                        | $2.49 \times 10^{-12}$      | ND                               |                                          |                        |                             |
| Shangzhong(Xu et al.,                           | Rain     |                                    | 4.95                         | $7.71 \times 10^{-11}$                  |                        | $1.06 \times 10^{-12}$      | 1.16                                | $4.84 \times 10^{-13}$                  |                        | $2.59 \times 10^{-13}$      | ND                               |                                          |                        |                             |

| 2009)                                        |       |                                |                                  |                                         |                        |                          |                                 |                                         |                        |                          |                                 |                                          |                                                  |                          |
|----------------------------------------------|-------|--------------------------------|----------------------------------|-----------------------------------------|------------------------|--------------------------|---------------------------------|-----------------------------------------|------------------------|--------------------------|---------------------------------|------------------------------------------|--------------------------------------------------|--------------------------|
| São Paulo State, Brazil(Coelho et al., 2011) | Rain  | 4.96 (Coelho et al., 2011)     | 7.80 (Coelho et al., 2011)       |                                         | $1.63 \times 10^{-10}$ | $1.67 \times 10^{-12}$   | 1.20 (Coelho et al., 2011)      |                                         | $7.57 \times 10^{-12}$ | $2.69 \times 10^{-13}$   | ND                              |                                          |                                                  |                          |
| Location (marine)                            |       | pH                             | Formate ( $\mu\text{M}$ )        | Formate loss rate ( $\text{M s}^{-1}$ ) |                        |                          | Oxalate ( $\mu\text{M}$ )       | Oxalate loss rate ( $\text{M s}^{-1}$ ) |                        |                          | Malonate ( $\mu\text{M}$ )      | Malonate loss rate ( $\text{M s}^{-1}$ ) |                                                  |                          |
|                                              |       |                                |                                  | bio (pH ~4)                             | bio (pH ~5)            | $\text{NO}_3^-$ (marine) |                                 | bio (pH ~4)                             | bio (pH ~5)            | $\text{NO}_3^-$ (marine) |                                 | bio (pH ~4)                              | bio (pH ~5)                                      | $\text{NO}_3^-$ (marine) |
| Puerto Rico(Gioda et al., 2011)              | Cloud | 5.5 (Gioda et al., 2011)       | 1.00 (Gioda et al., 2011)        |                                         | $2.09 \times 10^{-11}$ | $2.90 \times 10^{-13}$   | 0.50 (Gioda et al., 2011)       |                                         | $3.16 \times 10^{-12}$ | $1.52 \times 10^{-13}$   | ND                              |                                          |                                                  |                          |
| Puerto Rico(Gioda et al., 2011)              | Rain  | 5.3 (Gioda et al., 2011)       | 0.20 (Gioda et al., 2011)        |                                         | $4.19 \times 10^{-12}$ | $5.80 \times 10^{-14}$   | ND                              |                                         |                        |                          | ND                              |                                          |                                                  |                          |
| Puy de dôme(Vaitilingom et al., 2013)        | Cloud | 6.1 (Vaitilingom et al., 2013) | 4.90 (Vaitilingom et al., 2013)  |                                         | $1.03 \times 10^{-10}$ | $1.42 \times 10^{-12}$   | 1.00 (Vaitilingom et al., 2013) |                                         | $6.31 \times 10^{-12}$ | $3.04 \times 10^{-13}$   | 0.40 (Vaitilingom et al., 2012) |                                          | $1.47 \times 10^{-12}$<br>$1.55 \times 10^{-14}$ |                          |
| Location (urban)                             |       | pH                             | Formate ( $\mu\text{M}$ )        | Formate loss rate ( $\text{M s}^{-1}$ ) |                        |                          | Oxalate ( $\mu\text{M}$ )       | Oxalate loss rate ( $\text{M s}^{-1}$ ) |                        |                          | Malonate ( $\mu\text{M}$ )      | Malonate loss rate ( $\text{M s}^{-1}$ ) |                                                  |                          |
|                                              |       |                                |                                  | bio (pH ~4)                             | bio (pH ~5)            | $\text{NO}_3^-$ (urban)  |                                 | bio (pH ~4)                             | bio (pH ~5)            | $\text{NO}_3^-$ (urban)  |                                 | bio (pH ~4)                              | bio (pH ~5)                                      | $\text{NO}_3^-$ (urban)  |
| Shenzhen, South China(Huang et al., 2010)    | Rain  | 4.56 (Huang et al., 2010)      | 2.26 (Huang et al., 2010)        |                                         | $3.52 \times 10^{-11}$ |                          | 0.58 (Huang et al., 2010)       |                                         | $2.41 \times 10^{-13}$ |                          | ND                              |                                          |                                                  |                          |
| Anshun(Zhang et al., 2011)                   | Rain  | 4.67 (Zhang et al., 2011)      | 8.77 (Zhang et al., 2011)        |                                         | $1.37 \times 10^{-10}$ |                          | 2.84 (Zhang et al., 2011)       |                                         | $1.19 \times 10^{-12}$ |                          | ND                              |                                          |                                                  |                          |
| Newark US East Coast(Song and Gao, 2009)     | Rain  | 4.6 (Song and Gao, 2009)       | 4.44 (Song and Gao, 2009)        |                                         | $6.92 \times 10^{-11}$ |                          | 0.68 (Song and Gao, 2009)       |                                         | $2.85 \times 10^{-13}$ |                          | 0.29(Song and Gao, 2009)        |                                          | $6.61 \times 10^{-14}$<br>$2.27 \times 10^{-13}$ |                          |
| Hong Kong SAR(Li et al., 2020)               | Cloud | 3.87 (Li et al., 2020)         | 17.10 (Li et al., 2020)          |                                         | $2.66 \times 10^{-10}$ |                          | 10.30 (Li et al., 2020)         |                                         | $4.32 \times 10^{-12}$ |                          | 1.36 (Zhao et al., 2019)        |                                          | $3.10 \times 10^{-13}$<br>$1.07 \times 10^{-12}$ |                          |
| Puy de dome(Vaitilingom et al., 2013)        | Cloud | 3.9 (Vaitilingom et al., 2013) | 33.20 (Vaitilingom et al., 2013) |                                         | $5.17 \times 10^{-10}$ |                          | 9.30 (Vaitilingom et al., 2013) |                                         | $3.90 \times 10^{-12}$ |                          | 3.50 (Vaitilingom et al., 2013) |                                          | $7.97 \times 10^{-13}$<br>$2.74 \times 10^{-12}$ |                          |

162 ND: No data

## 163 **Section S1. Genome assembly, annotation, and taxonomic analysis**

164 Genome assembly of the sequencing reads was performed using the NECAT pipeline  
165 (v0.0.1\_update20200803) (Chen et al., 2021) with the default parameters. The reads were first  
166 corrected (PREP\_OUTPUT\_COVERAGE = 40, CNS\_OUTPUT\_COVERAGE = 30,  
167 MIN\_READ\_LENGTH = 3000) and then the corrected reads were assembled  
168 (OVLFP\_FAST\_OPTIONS = -n 500 -z 20 -b 2000 -e 0.5 -j 0 -u 1 -a 1000,  
169 OVLFP\_SENSITIVE\_OPTIONS = -n 500 -z 10 -e 0.5 -j 0 -u 1 -a 1000). Both the correction  
170 and assembly steps were progressive with multiple processing steps to improve the accuracy  
171 and completeness. The quality of the assembled genomes was evaluated using the  
172 Benchmarking Universal Single-copy Orthologs (BUSCO v5.3.1) tool based on the database  
173 of enterobacterales\_odb10 (Manni et al., 2021). For both strains B00910 and pf0910, complete  
174 circular chromosomes and plasmids were obtained.

175 Genome annotation was performed using Prokka (v1.14.6) (Seemann, 2014) with the  
176 default parameters. Whole genome-based taxonomic analysis was conducted using the Type  
177 (Strain) Genome Server (TYGS) (Meier-Kolthoff and Göker, 2019). Average Nucleotide  
178 Identity (ANI) was calculated by fastANI (v1.33) (Jain et al., 2018). Metabolic pathways were  
179 analyzed using the KEGG Mapper (Kanehisa et al., 2022) and the RAST server (Aziz et al.,  
180 2008). The sequences of the two genomes have been deposited in NCBI under the BioProject  
181 number PRJNA812965.

## 182 **Section S2. Extraction of water-insoluble and water-soluble biological material and** 183 **organic compounds for UPLC-MS analysis**

184 A modified Bligh & Dyer (BD) protocol was performed to extract water-insoluble  
185 organic compounds (Sündermann et al., 2016). Briefly, 3 mL of methanol (Duskan, LC-MS  
186 grade)/chloroform (RCI, HPLC grade) (1:2, v/v) was added to a filtered 5 mL sample solution  
187 and vortexed for 5 min, after which the samples were centrifuged at 3000 rpm for 10 min at 10  
188 °C. The bottom layer was collected into a clean 2 mL centrifuge tube and dried in a concentrator  
189 using nitrogen gas. The dried extracts were redissolved in 500 µL of acetonitrile (Duskan, LC-  
190 MS grade) and stored at -20 °C prior to UPLC-MS analysis. Solid-phase extraction (SPE) was

191 performed to remove the inorganic salts and extract the water-soluble organic compounds using  
192 hydrophobic lipophilic balanced (HLB) cartridges (Oasis HLB, 6cc 500 mg). The HLB  
193 cartridges were first preconditioned with 1 mL methanol and 2 mL Milli-Q water. A 10 mL  
194 filtered sample solution was then loaded into the SPE cartridge and washed with 20 mL Milli-  
195 Q water under vacuum at a flow rate of 5 mL/min. The elution was performed by adding 1.5  
196 mL methanol (Duskan, LC-MS grade). The eluent was evaporated to dryness under nitrogen  
197 gas and reconstituted in 500  $\mu$ L acetonitrile (Duskan, LC-MS grade).

### 198 **Section S3. UPLC-MS operation, data processing, and statistical analysis**

199 Chromatographic separation was performed on a Kinetex HILIC LC column (100  $\times$  2.1  
200 mm, 2.6  $\mu$ m, 100  $\text{\AA}$ , Phenomenex). The flow rate was fixed at 0.3 mL/min with ultra-pure  
201 water containing 5 mM ammonium acetate (Fisher, LC-MS grade) as mobile phase A and  
202 acetonitrile (Duskan, LC-MS grade) for mobile phase B. The following gradient program was  
203 used: 0 to 2 min 95% A; 2 to 4 min linear gradient to 80% B; 4 to 11 min linear gradient to  
204 65% B; 11 to 12.5 min 65% B; 12.5 to 13 min linear gradient to 95% B; 13 to 15 min  
205 equilibration wash with 95% B. Injection volume was set at 10  $\mu$ L. The information dependent  
206 analysis (IDA) acquisition was acquired with MS scan (100 to 1200 m/z) followed by MS/MS  
207 scan (50 to 1200 m/z) in positive ion mode. The following MS conditions were used: 30 PSI  
208 curtain gas, 60 PSI ion source gas, 3000 V ESI ion spray voltage, 320  $^{\circ}$ C source temperature,  
209 10 V collision energy for MS, and 80 V declustering potential. MS/MS was acquired with a  
210 collision energy was 20 V with 5 V spread. The raw MS data was processed for peak detection,  
211 retention time correction, alignment, and integration using the XCMS software built into the  
212 web-based Galaxy platform (<https://umsa.cerit-sc.cz/>) (Gowda et al., 2014). The processed data  
213 was then uploaded to MetaboAnalyst 5.0 (<https://www.metaboanalyst.ca/>) (Pang et al., 2021)  
214 to identify cellular compounds that had prominent ion intensities.

215 The raw UPLC-MS data first underwent preprocessing, normalization, and quality  
216 control steps using the XCMS software built into the web-based Galaxy platform (available at:  
217 <https://umsa.cerit-sc.cz/>). The raw data was processed for peak detection, alignment, and  
218 framing. This generated a table that displayed the retention time, mass-to-charge ratio (m/z),

219 and the intensity/peak area for each peak. The quality control step was performed to assess the  
220 stability of the intensities of peaks (“features”) between samples. This was performed using  
221 quality control samples, which were mixtures of equal amounts of experimental samples taken  
222 at each time point of the experiment. The relative standard deviation (RSD) of each feature in  
223 the quality control sample was compared to those in the experimental samples. Features with  
224 higher RSD in the quality control sample than in the experimental samples were excluded,  
225 while features with  $RSD < 30\%$  were retained for further analysis. Multivariable statistical  
226 analysis was performed on the retained features using principal component analysis (PCA) with  
227 95% confidence ellipse and partial least squares discrimination analysis (PLS-DA) to identify  
228 potential discriminations between the experimental samples. Heatmaps were generated to  
229 determine how the retained features changed at different time points during the experiment. A  
230 selection of discriminant ions and buckets was done based on the variable importance in  
231 projection (VIP) values. Features with VIP values greater than 1.0 were used for the  
232 identification step. MS/MS analysis was performed for the structural identification of  
233 compounds. The structure of each compound was deduced based on its adducts, isotopes, and  
234 MS/MS fragments using the SCIEX OS-Q software (AB Sciex). Information about  
235 compounds’ chemical structures, m/z, and retention times were subsequently uploaded to  
236 MetaboAnalyst 5.0 (<https://www.metaboanalyst.ca/>), which used this information to identify  
237 the compounds.

#### 238 **Section S4. IC operation**

239 Carboxylic acid concentrations were measured using a Dionex ICS-1100  
240 (ThermoFisher Scientific) system. Separation was achieved using a Dionex IonPac AS18 (4 ×  
241 250 mm) anion exchange column (Thermo Scientific) equipped with a Dionex IonPac AG18  
242 (4 × 50 mm) guard column (Thermo Scientific). 16 mM potassium hydroxide (Fisher, ≥85%)  
243 was used as the mobile phase at a flow rate of 1.0 mL/min for a 30 min run time. Each aliquot  
244 of solution was passed through a syringe filter before IC analysis.

#### 245 **Section S5. Possible enzymes and mechanisms associated with carboxylic acid** 246 **biodegradation by the two bacterial strains**



247 Table S4 summarized enzymes or metabolic pathways related to the biodegradation of  
248 carboxylic acids. Genes encoding formate dehydrogenases were identified in both genomes,  
249 which is consistent with the observed formate biodegradation. However, no known genes for  
250 oxalic acid biodegradation (Liu et al., 2021) were found in the genomes of both strains, which  
251 suggested the presence of yet to be characterized pathways that catalyzed the biodegradation.  
252 Interestingly, a protein with Cupin 2 domain was found in both genomes. The Cupin  
253 superfamily consists of a diverse range of enzymes including oxalate oxidase and oxalate  
254 decarboxylase that can biodegrade oxalic acid (Burrell et al., 2007).

255 Only the *E. hormaechei* B0910 strain was observed to biodegrade malonic acid.  
256 Interestingly, the malonyl-CoA-acyl carrier transcacylase observed in the *E. hormaechei*  
257 pf0910 strain seems to be a fusion protein, which may render it ineffective in utilizing malonic  
258 acid. Although no gene encoding maleate isomerase was identified in the genomes of both  
259 strains, the maleic acid biodegradation observed can be attributed to the activity of other  
260 enzymes with broad substrates specificity (Hatakeyama et al., 2000). The genes encoding for  
261 the small and large protein subunits that together form the 3-isopropylmalate dehydratase, the  
262 enzyme that isomerizes 2-isopropylmalate to 3-isopropylmalate, were found in both the  
263 *Enterobacter* strains. The small and large protein subunits of this enzyme are homologous to  
264 the small (51% amino acid identity) and large (59% amino acid identity) protein subunit  
265 constituents of maleate hydratase (HbzIJ) from *Pseudomonas alcaligenes* NCIMB 9867 that  
266 converts maleate to D-malate (Liu et al., 2015). Given the high protein homology, we speculate  
267 that the 3-isopropylmalate dehydratase in the *Enterobacter* strains may have a broader substrate  
268 specificity than known and it may be able to biodegrade maleate.

269 The lack of biodegradation of acetic acid, MSA, and glutaric acid in the experiments  
270 could be partly explained by the genomic information. Both strains have genes that encode  
271 enzymes involved in the biodegradation (Table S4) and associated uptake transporters (i.e.,  
272 acetate permease (ActP) and succinate-acetate/proton symporter (SatP)) of acetic acid. The  
273 lack of the corresponding biodegradation in the experiments could be due to the low uptake of  
274 acetic acid by cells as ActP functions to scavenge low concentrations of the compound  
275 (Gimenez et al., 2003) while SatP could be inhibited by formic acid found in the cloud water

276 medium (Sá-Pessoa et al., 2013). Genes encoding the two-component alkanesulfonate  
 277 monooxygenase for MSA biodegradation were found in both strains, but they were likely not  
 278 expressed as sulfur was not deficient in the cloud water medium (Kahnert et al., 2000; Eichhorn  
 279 and Leisinger, 2001), which is consistent with the absence of MSA biodegradation in the  
 280 experiments. While genes encoding succinate-semialdehyde dehydrogenase/glutarate-  
 281 semialdehyde dehydrogenase, which display a reversible conversion between glutarate-  
 282 semialdehyde and glutarate in the KEGG database (Kanehisa et al., 2022), were found in both  
 283 strains, to our knowledge there is no report of experimental results confirming that the reaction  
 284 can go in the reverse direction from glutarate to glutarate-semialdehyde. In addition, a study of  
 285 glutaric semialdehyde dehydrogenase reported the irreversible nature of the catalysis of  
 286 glutarate semialdehyde to glutarate (Ichihara and Ichihara, 1961). Thus, it is not surprising that  
 287 glutarate biodegradation was not observed for the two strains.

## 288 **Section S6. Estimation of biodegradation and chemical reaction rates ( $M s^{-1}$ ) in cloud** 289 **water**

### 290 **S6.1. Biodegradation**

291 The decay in the concentration of a specific carboxylic acid as a function of time during  
 292 a biodegradation experiment can be described by the following equation:

$$293 \frac{d[Acid]}{dt} = k'_{cell} \times [Acid] = k_{cell,acid} \times [cell]_{experiment} \times [Acid]_{experiment}$$

294 where  $k'_{cell}$  ( $s^{-1}$ ) is the pseudo first order rate constant obtained from fitting the decay of the  
 295 carboxylic acid, and  $[Acid]_{experiment}$  ( $mol L^{-1}$ ) is the initial concentration of the carboxylic  
 296 acid used in the biodegradation experiment.  $k'_{cell}$  is the product of the concentration of bacteria  
 297 cells used in the experiment ( $[cell]_{experiment}$ ,  $cell L^{-1}$ ) and the biodegradation rate constant  
 298 ( $k_{cell,acid}$ ,  $L cell^{-1} s^{-1}$ ).

299 The loss rate of the carboxylic acid in cloud water resulting from biodegradation is:

$$300 \frac{d[Acid]_{cloud}}{dt} = k_{cell,acid} \times [cell]_{cloud} \times [Acid]_{cloud}$$

301 where  $[cell]_{cloud}$  ( $cell L^{-1}$ ) is the concentration of bacteria cells present in cloud water  
302 ( $cell L^{-1}$ ), and  $[Acid]_{cloud}$  ( $mol L^{-1}$ ) is the concentration of the carboxylic in cloud water.

## 303 S6.2. Chemical reactions

304 The loss rates of the carboxylic acid in cloud water resulting from reactions with  $\cdot OH$   
305 and  $NO_3\cdot$  are:

$$306 \frac{d[Acid]_{cloud}}{dt} = k_{OH,acid} \times [\cdot OH]_{cloud} \times [Acid]_{cloud}$$

$$307 \frac{d[Acid]_{cloud}}{dt} = k_{NO_3,acid} \times [NO_3\cdot]_{cloud} \times [Acid]_{cloud}$$

308 where  $k_{OH,acid}$  ( $L mol^{-1}s^{-1}$ ) and  $k_{NO_3,acid}$  ( $L mol^{-1}s^{-1}$ ) are the rate constants for the  
309 reactions of the carboxylic acid with  $\cdot OH$  and  $NO_3\cdot$ , respectively, and  $[\cdot OH]_{cloud}$  ( $mol L^{-1}$ )  
310 and  $[NO_3\cdot]_{cloud}$  ( $mol L^{-1}$ ) are the concentrations of  $\cdot OH$  and  $NO_3\cdot$  in cloud water,  
311 respectively.

## 312 References

313 Amato, P., Parazols, M., Sancelme, M., Mailhot, G., Laj, P., and Delort, A.-M.: An important  
314 oceanic source of micro-organisms for cloud water at the Puy de Dôme (France), Atmospheric  
315 Environment, 41, 8253-8263, <https://doi.org/10.1016/j.atmosenv.2007.06.022>, 2007.

316 Aziz, R. K., Bartels, D., Best, A. A., DeJongh, M., Disz, T., Edwards, R. A., Formsma, K.,  
317 Gerdes, S., Glass, E. M., and Kubal, M.: The RAST Server: rapid annotations using subsystems  
318 technology, BMC genomics, 9, 1-15, <https://doi.org/10.1186/1471-2164-9-75>, 2008.

319 Bianco, A., Deguillaume, L., Vaitilingom, M., Nicol, E., Baray, J. L., Chaumerliac, N., and  
320 Bridoux, M.: Molecular Characterization of Cloud Water Samples Collected at the Puy de  
321 Dome (France) by Fourier Transform Ion Cyclotron Resonance Mass Spectrometry,  
322 Environmental Science & Technology, 52, 10275-10285,  
323 <https://doi.org/10.1021/acs.est.8b01964>, 2018.

324 Brantner, B., Fierlinger, H., Puxbaum, H., and Berner, A.: Cloudwater chemistry in the  
325 subcooled droplet regime at Mount Sonnblick (3106 m asl, Salzburg, Austria), Water, Air, and  
326 Soil Pollution, 74, 363-384, <https://doi.org/10.1007/BF00479800>, 1994.

327 Burrell, M. R., Just, V. J., Bowater, L., Fairhurst, S. A., Requena, L., Lawson, D. M., and  
328 Bornemann, S.: Oxalate decarboxylase and oxalate oxidase activities can be interchanged with  
329 a specificity switch of up to 282 000 by mutating an active site lid, Biochemistry, 46, 12327-  
330 12336, <https://doi.org/10.1021/bi700947s>, 2007.

331 Chen, Y., Nie, F., Xie, S.-Q., Zheng, Y.-F., Dai, Q., Bray, T., Wang, Y.-X., Xing, J.-F., Huang,  
332 Z.-J., and Wang, D.-P.: Efficient assembly of nanopore reads via highly accurate and intact  
333 error correction, *Nature Communications*, 12, 1-10, [https://doi.org/10.1038/s41467-020-](https://doi.org/10.1038/s41467-020-20236-7)  
334 [20236-7](https://doi.org/10.1038/s41467-020-20236-7), 2021.

335 Cheng, Y., Liu, Y., Huo, M., Sun, Q., Wang, H., Chen, Z., and Bai, Y.: Chemical characteristics  
336 of precipitation at Nanping Mangdang Mountain in eastern China during spring, *Journal of*  
337 *Environmental Sciences*, 23, 1350-1358, [https://doi.org/10.1016/S1001-0742\(10\)60560-8](https://doi.org/10.1016/S1001-0742(10)60560-8),  
338 2011.

339 Coelho, C. H., Allen, A. G., Fornaro, A., Orlando, E. A., Grigoletto, T. L., and Campos, M. L.  
340 A.: Wet deposition of major ions in a rural area impacted by biomass burning emissions,  
341 *Atmospheric environment*, 45, 5260-5265, <https://doi.org/10.1016/j.atmosenv.2011.06.063>,  
342 2011.

343 Eichhorn, E. and Leisinger, T.: *Escherichia coli* utilizes methanesulfonate and L-cysteate as  
344 sole sulfur sources for growth, *FEMS microbiology letters*, 205, 271-275,  
345 <https://doi.org/10.1111/j.1574-6968.2001.tb10960.x>, 2001.

346 Gimenez, R., Nuñez, M. F., Badia, J., Aguilar, J., and Baldoma, L.: The gene *yjcG*,  
347 cotranscribed with the gene *acs*, encodes an acetate permease in *Escherichia coli*, *Journal of*  
348 *bacteriology*, 185, 6448-6455, <https://doi.org/10.1128/JB.185.21.6448-6455.2003>, 2003.

349 Gioda, A., Reyes-Rodriguez, G. J., Santos-Figueroa, G., Collett, J. L., Decesari, S., Ramos, M.,  
350 Netto, H., Neto, F. R. D., and Mayol-Bracero, O. L.: Speciation of water-soluble inorganic,  
351 organic, and total nitrogen in a background marine environment: Cloud water, rainwater, and  
352 aerosol particles, *Journal of Geophysical Research-Atmospheres*, 116,  
353 <https://doi.org/10.1029/2010jd015010>, 2011.

354 Gowda, H., Ivanisevic, J., Johnson, C. H., Kurczy, M. E., Benton, H. P., Rinehart, D., Nguyen,  
355 T., Ray, J., Kuehl, J., Arevalo, B., Westenskow, P. D., Wang, J., Arkin, A. P., Deutschbauer, A.  
356 M., Patti, G. J., and Siuzdak, G.: Interactive XCMS Online: simplifying advanced metabolomic  
357 data processing and subsequent statistical analyses, *Anal Chem*, 86, 6931-6939,  
358 <https://doi.org/10.1021/ac500734c>, 2014.

359 Guo, J., Wang, Y., Shen, X., Wang, Z., Lee, T., Wang, X., Li, P., Sun, M., Collett Jr, J. L., and  
360 Wang, W.: Characterization of cloud water chemistry at Mount Tai, China: Seasonal variation,  
361 anthropogenic impact, and cloud processing, *Atmospheric Environment*, 60, 467-476,  
362 <https://doi.org/10.1016/j.atmosenv.2012.07.016>, 2012.

363 Hatakeyama, K., GoTo, M., Kobayashi, M., Terasawa, M., and Yukawa, H.: Analysis of  
364 oxidation sensitivity of maleate cis-trans isomerase from *Serratia marcescens*, *Bioscience,*  
365 *biotechnology, and biochemistry*, 64, 1477-1485, <https://doi.org/10.1271/bbb.64.1477>, 2000.

366 Herrmann, H., Hoffmann, D., Schaefer, T., Brauer, P., and Tilgner, A.: Tropospheric aqueous-  
367 phase free-radical chemistry: radical sources, spectra, reaction kinetics and prediction tools,

368 Chemphyschem, 11, 3796-3822, <https://doi.org/10.1002/cphc.201000533>, 2010.

369 Huang, X.-F., Li, X., He, L.-Y., Feng, N., Hu, M., Niu, Y.-W., and Zeng, L.-W.: 5-Year study  
370 of rainwater chemistry in a coastal mega-city in South China, Atmospheric Research, 97, 185-  
371 193, <https://doi.org/10.1016/j.atmosres.2010.03.027>, 2010.

372 Ichihara, A. and Ichihara, E. A.: Metabolism of L-Lysine by Bacterial Enzymes V. Glutaric  
373 Semialdehyde Dehydrogenase, The Journal of Biochemistry, 49, 154-157,  
374 <https://doi.org/10.1093/oxfordjournals.jbchem.a127272>, 1961.

375 Jain, C., Rodriguez-R, L. M., Phillippy, A. M., Konstantinidis, K. T., and Aluru, S.: High  
376 throughput ANI analysis of 90K prokaryotic genomes reveals clear species boundaries, Nature  
377 communications, 9, 1-8, <https://doi.org/10.1038/s41467-018-07641-9>, 2018.

378 Kahnert, A., Vermeij, P., Wietek, C., James, P., Leisinger, T., and Kertesz, M. A.: The ssu locus  
379 plays a key role in organosulfur metabolism in Pseudomonas putida S-313, Journal of  
380 bacteriology, 182, 2869-2878, <https://doi.org/10.1128/JB.182.10.2869-2878.2000>, 2000.

381 Kanehisa, M., Sato, Y., and Kawashima, M.: KEGG mapping tools for uncovering hidden  
382 features in biological data, Protein Science, 31, 47-53, <https://doi.org/10.1002/pro.4172>, 2022.

383 Khwaja, H. A., Brudnoy, S., and Husain, L.: Chemical characterization of three summer cloud  
384 episodes at Whiteface Mountain, Chemosphere, 31, 3357-3381, [https://doi.org/10.1016/0045-  
385 6535\(95\)00187-D](https://doi.org/10.1016/0045-6535(95)00187-D), 1995.

386 Laszakovits, J. R. and MacKay, A. A.: Data-Based Chemical Class Regions for Van Krevelen  
387 Diagrams, Journal of the American Society for Mass Spectrometry, 33, 198-202,  
388 <https://doi.org/10.1021/jasms.1c00230>, 2022.

389 Li, T., Wang, Z., Wang, Y., Wu, C., Liang, Y., Xia, M., Yu, C., Yun, H., Wang, W., Wang, Y.,  
390 Guo, J., Herrmann, H., and Wang, T.: Chemical characteristics of cloud water and the impacts  
391 on aerosol properties at a subtropical mountain site in Hong Kong SAR, Atmospheric  
392 Chemistry and Physics, 20, 391-407, <https://doi.org/10.5194/acp-20-391-2020>, 2020.

393 Limbeck, A. and Puxbaum, H.: Dependence of in-cloud scavenging of polar organic aerosol  
394 compounds on the water solubility, Journal of Geophysical Research-Atmospheres, 105,  
395 19857-19867, <https://doi.org/10.1029/2000jd900123>, 2000.

396 Liu, K., Xu, Y., and Zhou, N.-Y.: Identification of a specific maleate hydratase in the direct  
397 hydrolysis route of the gentisate pathway, Applied and Environmental Microbiology, 81, 5753-  
398 5760, <https://doi.org/10.1128/AEM.00975-15>, 2015.

399 Liu, M., Devlin, J. C., Hu, J., Volkova, A., Battaglia, T. W., Ho, M., Asplin, J. R., Byrd, A., Li,  
400 H., and Ruggles, K. V.: Microbial genetic and transcriptional contributions to oxalate  
401 degradation by the gut microbiota in health and disease, Elife, 10, e63642,  
402 <https://doi.org/10.7554/eLife.63642>, 2021.

403 Löflund, M., Kasper-Giebl, A., Schuster, B., Giebl, H., Hitzemberger, R., and Puxbaum, H.:  
404 Formic, acetic, oxalic, malonic and succinic acid concentrations and their contribution to  
405 organic carbon in cloud water, *Atmospheric Environment*, 36, 1553-1558,  
406 [https://doi.org/10.1016/S1352-2310\(01\)00573-8](https://doi.org/10.1016/S1352-2310(01)00573-8), 2002.

407 Manni, M., Berkeley, M. R., Seppey, M., and Zdobnov, E. M.: BUSCO: assessing genomic  
408 data quality and beyond, *Current Protocols*, 1, e323, <https://doi.org/10.1002/cpz1.323>, 2021.

409 Meier-Kolthoff, J. P. and Göker, M.: TYGS is an automated high-throughput platform for state-  
410 of-the-art genome-based taxonomy, *Nature communications*, 10, 1-10,  
411 <https://doi.org/10.1038/s41467-019-10210-3>, 2019.

412 Pang, Z., Chong, J., Zhou, G., de Lima Morais, D. A., Chang, L., Barrette, M., Gauthier, C.,  
413 Jacques, P. E., Li, S., and Xia, J.: MetaboAnalyst 5.0: narrowing the gap between raw spectra  
414 and functional insights, *Nucleic Acids Res*, 49, W388-W396,  
415 <https://doi.org/10.1093/nar/gkab382>, 2021.

416 Sá-Pessoa, J., Paiva, S., Ribas, D., Silva, I. J., Viegas, S. C., Arraiano, C. M., and Casal, M.:  
417 SATP (YaaH), a succinate–acetate transporter protein in *Escherichia coli*, *Biochemical journal*,  
418 454, 585-595, <https://doi.org/10.1042/BJ20130412>, 2013.

419 Seemann, T.: Prokka: rapid prokaryotic genome annotation, *Bioinformatics*, 30, 2068-2069,  
420 <https://doi.org/10.1093/bioinformatics/btu153>, 2014.

421 Song, F. and Gao, Y.: Chemical characteristics of precipitation at metropolitan Newark in the  
422 US East Coast, *Atmospheric Environment*, 43, 4903-4913,  
423 <https://doi.org/10.1016/j.atmosenv.2009.07.024>, 2009.

424 Sun, X., Wang, Y., Li, H., Yang, X., Sun, L., Wang, X., Wang, T., and Wang, W.: Organic acids  
425 in cloud water and rainwater at a mountain site in acid rain areas of South China, *Environ Sci*  
426 *Pollut Res Int*, 23, 9529-9539, <https://doi.org/10.1007/s11356-016-6038-1>, 2016.

427 Sündermann, A., Eggers, L. F., and Schwudke, D.: Liquid Extraction: Bligh and Dyer, in:  
428 *Encyclopedia of Lipidomics*, 1-4, [https://doi.org/10.1007/978-94-007-7864-1\\_88-1](https://doi.org/10.1007/978-94-007-7864-1_88-1), 2016.

429 Tsai, Y. I. and Kuo, S.-C.: Contributions of low molecular weight carboxylic acids to aerosols  
430 and wet deposition in a natural subtropical broad-leaved forest environment, *Atmospheric*  
431 *Environment*, 81, 270-279, <https://doi.org/10.1016/j.atmosenv.2013.08.061>, 2013.

432 Vaitilingom, M., Deguillaume, L., Vinatier, V., Sancelme, M., Amato, P., Chaumerliac, N., and  
433 Delort, A. M.: Potential impact of microbial activity on the oxidant capacity and organic carbon  
434 budget in clouds, *Proc Natl Acad Sci U S A*, 110, 559-564,  
435 <https://doi.org/10.1073/pnas.1205743110>, 2013.

436 Vaitilingom, M., Attard, E., Gaiani, N., Sancelme, M., Deguillaume, L., Flossmann, A. I.,  
437 Amato, P., and Delort, A.-M.: Long-term features of cloud microbiology at the puy de Dôme  
438 (France), *Atmospheric Environment*, 56, 88-100,

439 <https://doi.org/10.1016/j.atmosenv.2012.03.072>, 2012.

440 Wang, Y., Sun, M., Li, P., Li, Y., Xue, L., and Wang, W.: Variation of low molecular weight  
441 organic acids in precipitation and cloudwater at high elevation in South China, Atmospheric  
442 environment, 45, 6518-6525, <https://doi.org/10.1016/j.atmosenv.2011.08.064>, 2011.

443 Wobrock, W., Schell, D., Maser, R., Jaeschke, W., Georgii, H.-W., Wieprecht, W., Arends, B.,  
444 Mols, J., Kos, G., and Fuzzi, S.: The Kleiner Feldberg Cloud Experiment 1990. An overview,  
445 Journal of Atmospheric Chemistry, 19, 3-35, <https://doi.org/10.1007/BF00696581>, 1994.

446 Xu, G., Lee, X., and Lv, Y.: Urban and rural observations of carboxylic acids in rainwater in  
447 Southwest of China: the impact of urbanization, Journal of atmospheric chemistry, 62, 249-  
448 260, <https://doi.org/10.1007/s10874-010-9151-4>, 2009.

449 Zhang, Y., Lee, X., and Cao, F.: Chemical characteristics and sources of organic acids in  
450 precipitation at a semi-urban site in Southwest China, Atmospheric environment, 45, 413-419,  
451 <https://doi.org/10.1016/j.atmosenv.2010.09.067>, 2011.

452 Zhao, W., Wang, Z., Li, S., Li, L., Wei, L., Xie, Q., Yue, S., Li, T., Liang, Y., and Sun, Y.: Water-  
453 soluble low molecular weight organics in cloud water at Mt. Tai Mo Shan, Hong Kong, Science  
454 of the Total Environment, 697, 134095, <https://doi.org/10.1016/j.scitotenv.2019.134095>, 2019.  
455
